# Supplementary material for: Phosphorylation of 17β-hydroxysteroid dehydrogenase 13 at serine 33 attenuates nonalcoholic fatty liver disease in mice
Source: PubMed Central journal article supplement (PMC9630536; doi:10.1038/s41467-022-34299-1), 2022-11-02

**Phosphorylation of 17 $\beta$ -hydroxysteroid dehydrogenase 13 at serine 33  
attenuates nonalcoholic fatty liver disease in mice**

**Supplemental figures**

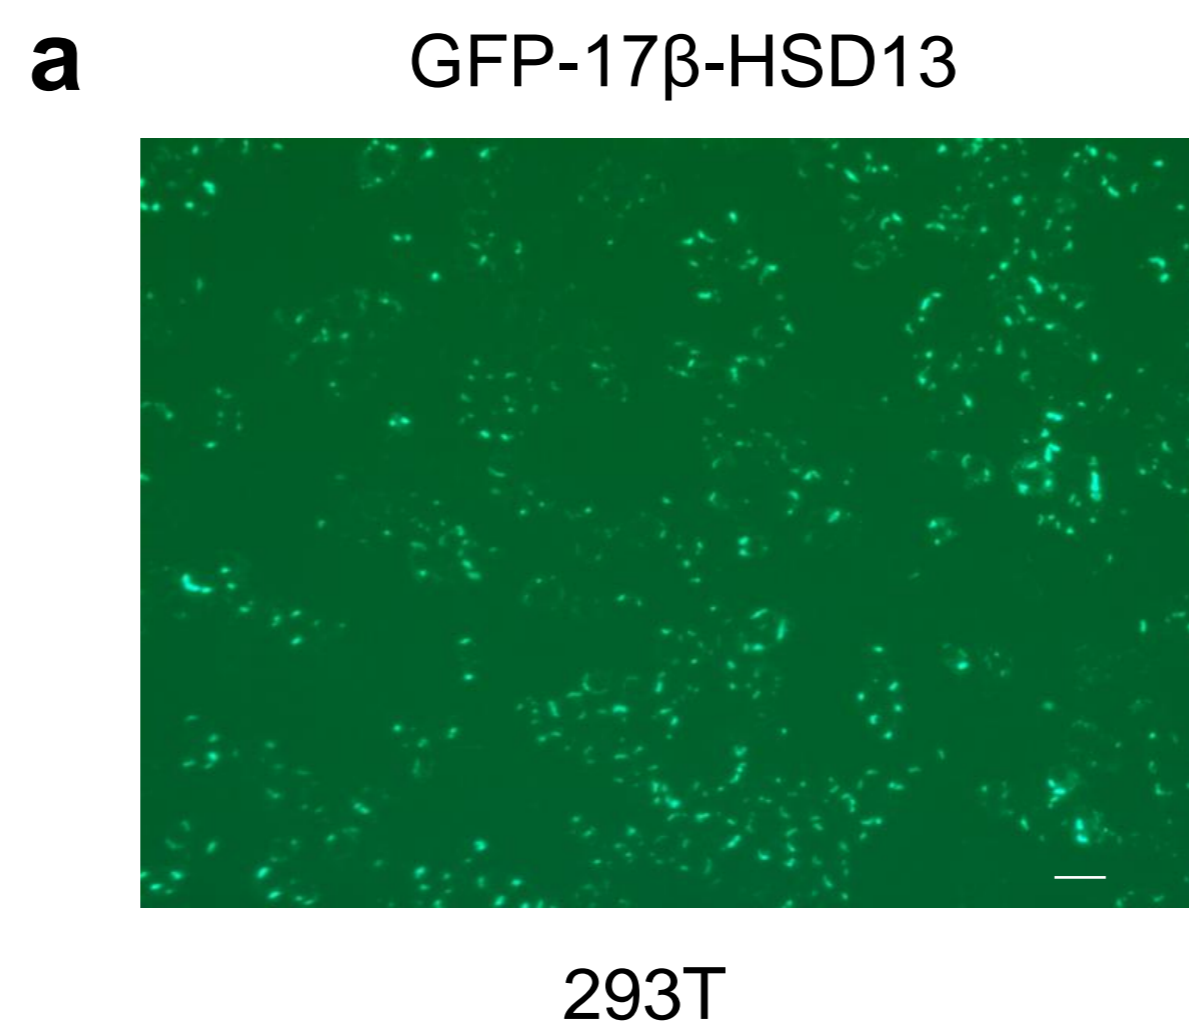

**Figure S1. Expression of a GFP-tagged 17 $\beta$ -HSD13-WT protein in HEK293 cells. Scale bar=100 $\mu$ m.**

**Figure S2.**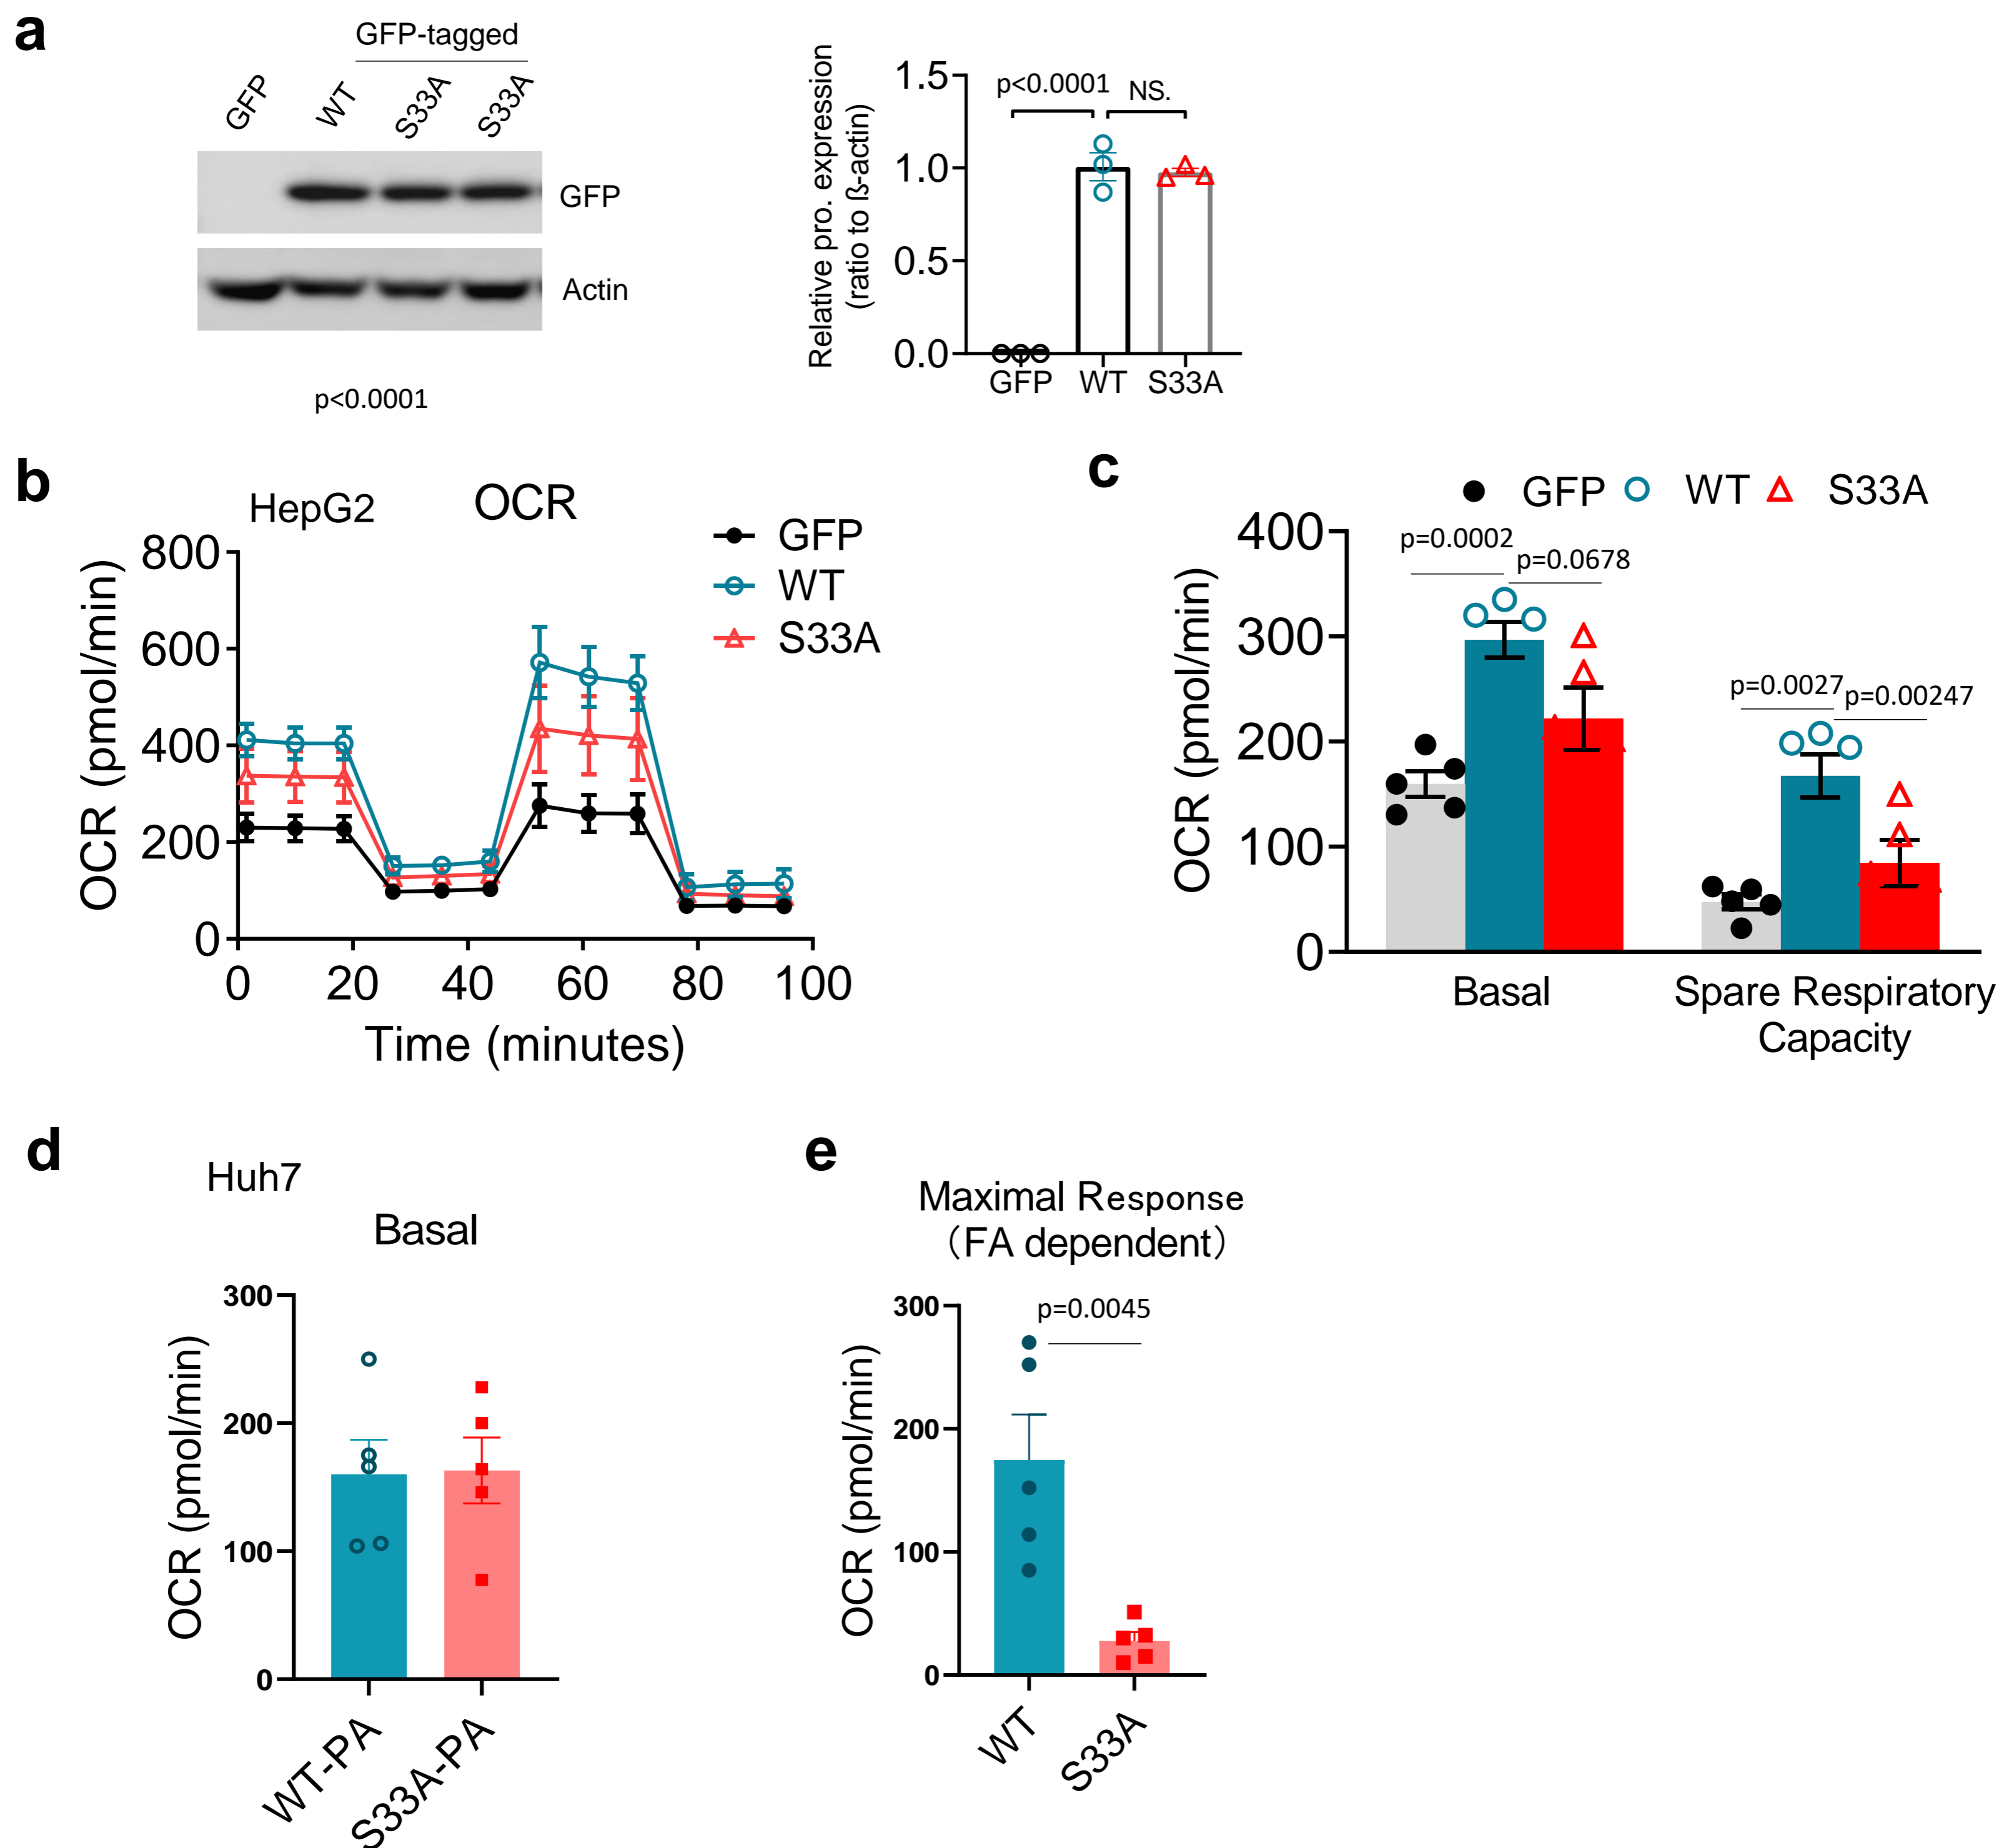**Figure S2. The 17 $\beta$ -HSD13-S33A mutant cells are resistant to lipolysis.**

**(a)** Huh7 cells were infected with GFP, GFP-tagged 17 $\beta$ -HSD13-WT (WT) or 17 $\beta$ -HSD13-S33A (S33A) lentiviruses. Exogenous HSD17B13 protein expression levels were examined with an anti-GFP antibody and quantified. GFP:  $n = 3$ ; WT:  $n = 3$ ; S33A:  $n = 3$  biologically independent cells.

**(b&c)** HepG2 cells were stably infected with the lentiviruses carrying a full-length GFP (GFP), GFP-tagged 17 $\beta$ -HSD13-WT (WT) or GFP-tagged 17 $\beta$ -HSD13-S33A mutant (S33A). Mitochondrial respiration was analyzed in real-time using the Seahorse XF24 Extracellular Flux Analyzer. The oxygen consumption rate (OCR) **(b)** at different stages of respiration, basal and spare respiratory capacity **(c)** were measured as described in the "Methods" section. GFP:  $n = 5$ ; WT:  $n = 4$ ; S33A:  $n = 4$  biologically independent cells.

**(d&e)** Oxygen consumption rate (OCR) in the presence of exogenous palmitic acid in WT and the S33A mutant Huh7 cells. Advanced ORC was measured in real-time using the Seahorse® metabolic flux analyzer as described in the section of "Materials and Methods". **(d)** Basal OCR due to utilization of exogenous fatty acids in the WT-PA group and S33A-PA group. **(e)** Maximal respiration due to the addition of FCCP. WT-PA:  $n = 5$ ; Medium-S33A-PA:  $n = 4$ .

Data represent mean  $\pm$  SEM; Significance was calculated by one-way ANOVA with Bonferroni post hoc analysis **(a, c)** or two-tailed student's t test **(d-e)**.

**a**

Genomic region of mouse *Hsd17b13* locus is diagrammed below (gene is oriented from left to right, total size is 21.93 kb). Solid bars represent ORF; open bars represent UTRs.

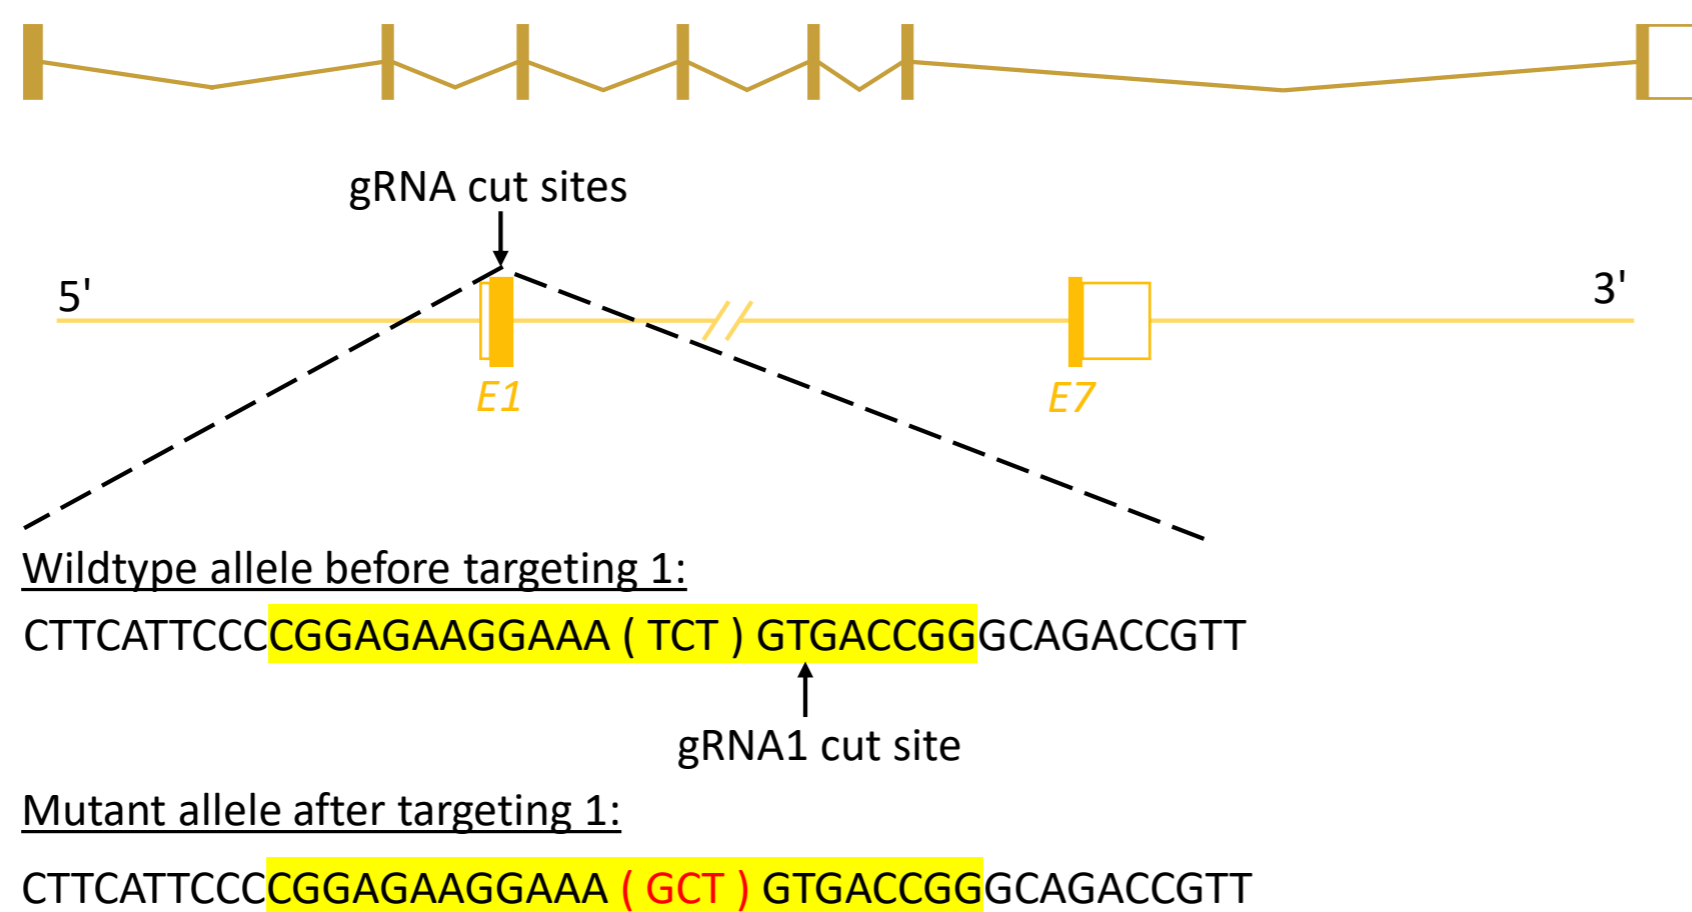**b**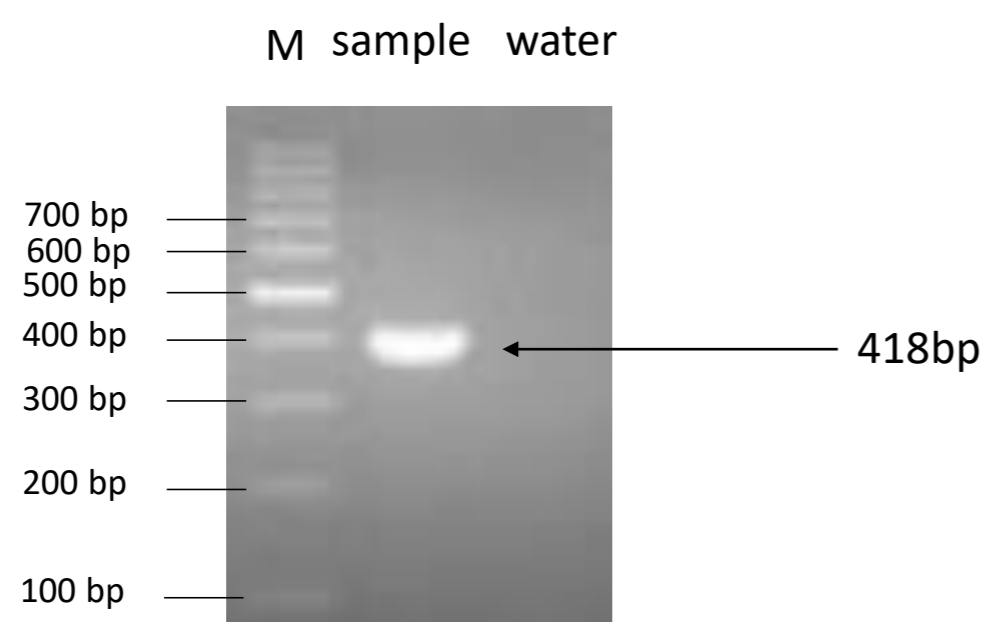**c**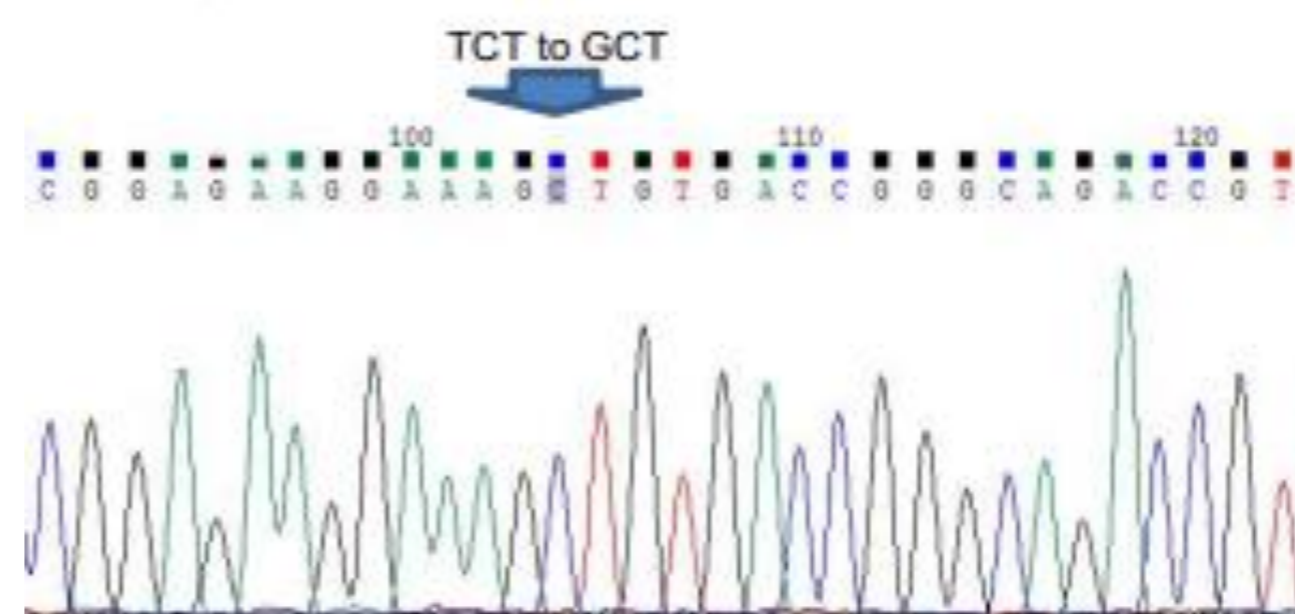**d**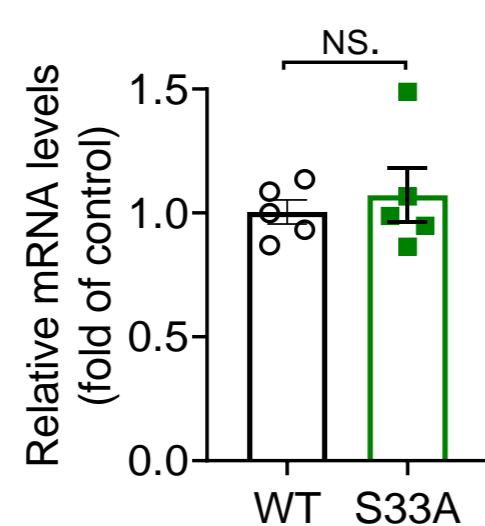**e**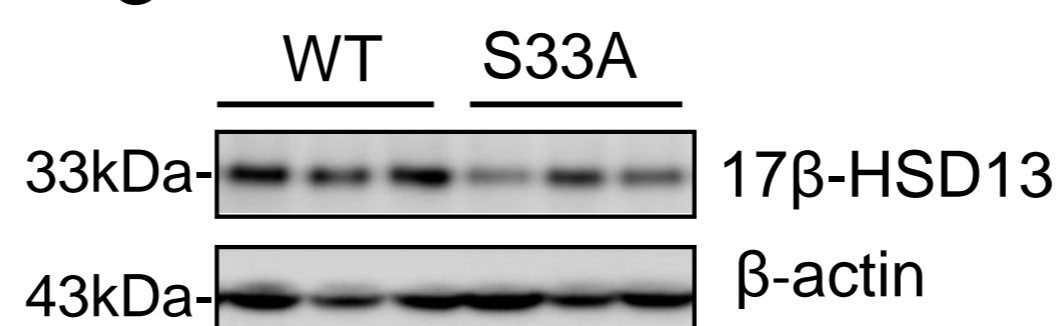

**Fig. S3. Generation and genotyping of 17β-HSD13-S33A knockin mouse.**

**(a)** A knockin mouse with a point mutation (S33A) in *hsd17b13* gene on C57BL/6 background was created by CRISPR/Cas9-mediated genome engineering.

**(b)** PCR-based genotyping of the mouse with the S33A point mutation.

**(c)** PCR product was sequenced to validate the genotype of homozygous mice (*Hsd17B13*<sup>33A/A</sup>). The sequence primer used for PCR product is 5'-AAA GCC AGC ACT AAT TTA CGT CTCT-3'.

**(d&e)** 17β-HSD13 mRNA **(d)** (WT: *n* = 5; S33A: *n* = 5 biologically independent animals) and protein levels **(e)** (WT: *n* = 3; S33A: *n* = 3 biologically independent animals) in the livers of male (12-week old) *Hsd17B13*<sup>+/+</sup> (WT) and *Hsd17B13*<sup>33A/A</sup> (S33A) mice fed a chow diet.

Data represent mean ± SEM; Significance was calculated by two-tailed student's t test.



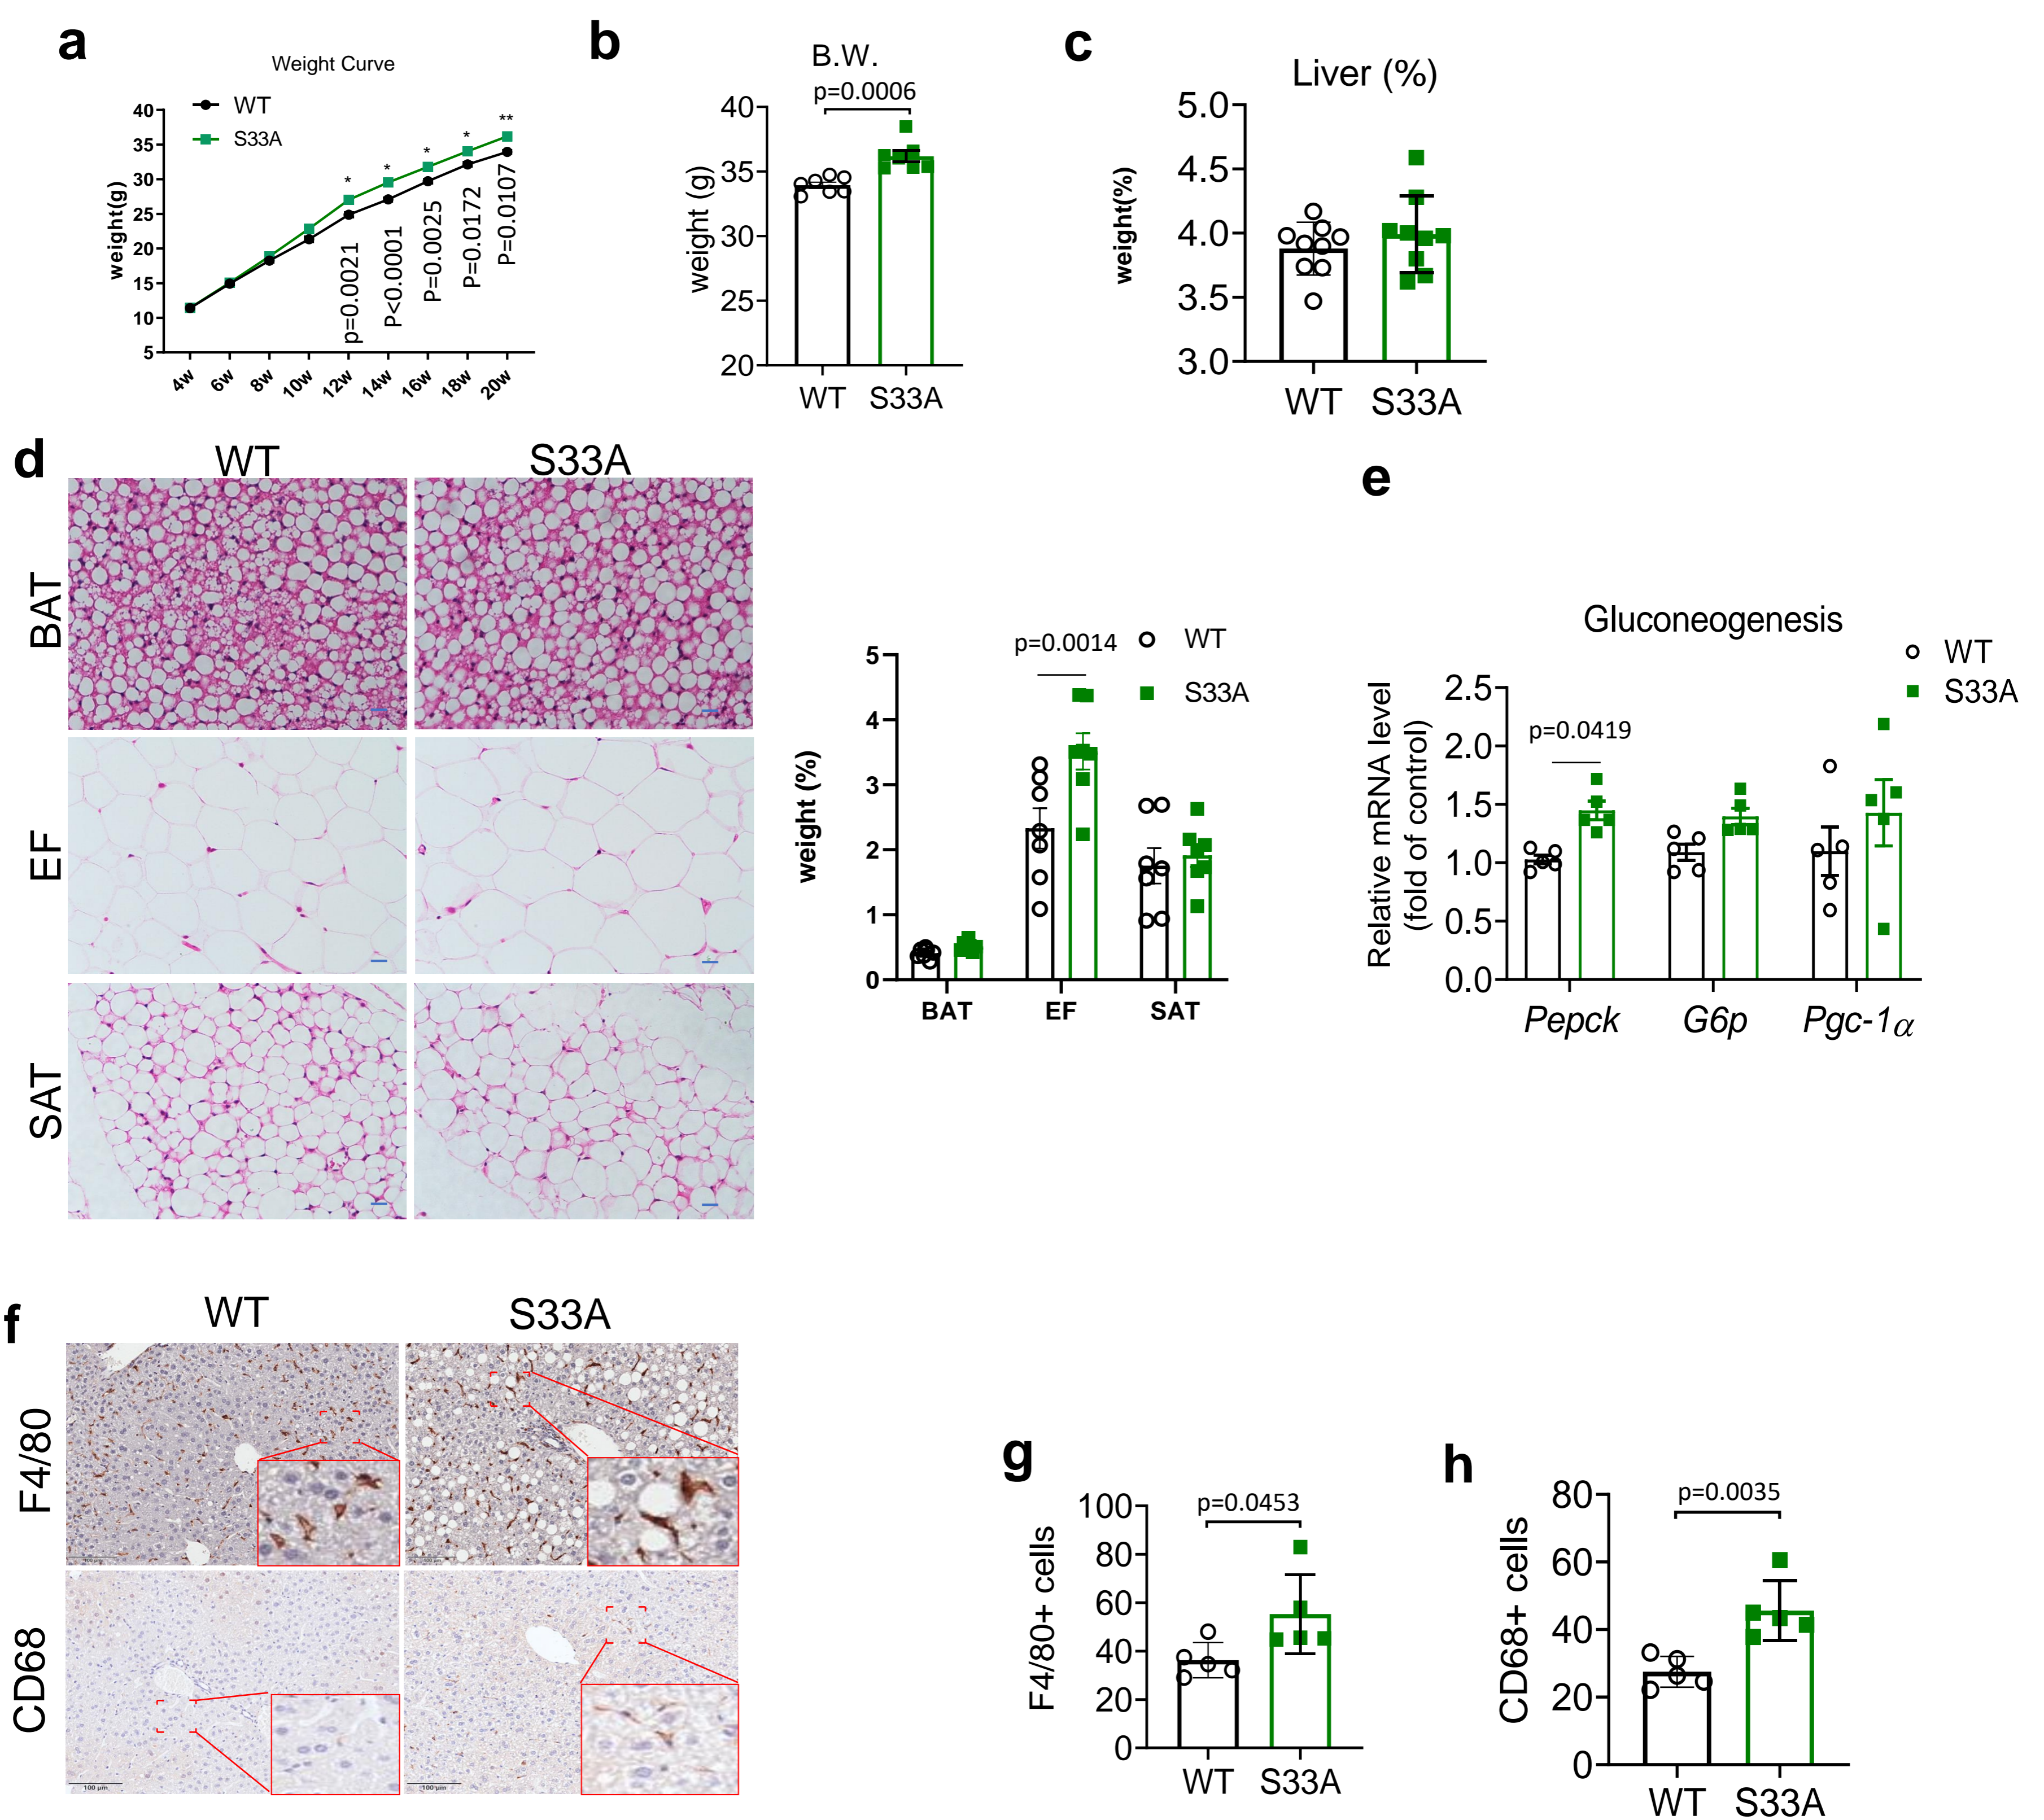

**Figure S4. Metabolic parameters of the *Hsd17b13*<sup>+/+</sup> and *Hsd17b13*<sup>33A/A</sup> mice.**

*Hsd17b13*<sup>+/+</sup> (WT) and *Hsd17b13*<sup>33A/A</sup> (S33A) mice were fed a chow diet for 5 months. (a-c) Body weight curve (a), body weight at the age of 20 weeks (b), liver weight (%) (c) of the mice. WT: *n*=7 (a-b) or *n*=9 (c); S33A: *n*=7 (a-b) or *n*=9 (c) biologically independent animals. (d) H&E staining and weight ratios of brown fat tissue (BAT), epididymal fat (EF) and subcutaneous adipose tissue (SAT) in WT and S33A mice. WT: *n*=7; S33A: *n*=7 biologically independent animals. (e) Quantitative RT-PCR analysis showing the expression of genes involved in gluconeogenesis in the WT and S33A mice. WT: *n*=5; S33A: *n*=5 biologically independent animals. (f-h) Immunostaining of F4/80 and CD68, specific markers of macrophages in WT and S33A mice at the age of 5 months (f). Quantification data of F4/80<sup>+</sup> cells (g) and CD68<sup>+</sup> cells (h) were displayed. WT: *n*=5; S33A: *n*=5 biologically independent animals.

Data represent mean  $\pm$  SEM; Significance was calculated by two-tailed student's *t* test (b&c), (g&h) or two-way ANOVA with Bonferroni post hoc analysis (d&e).



**a**

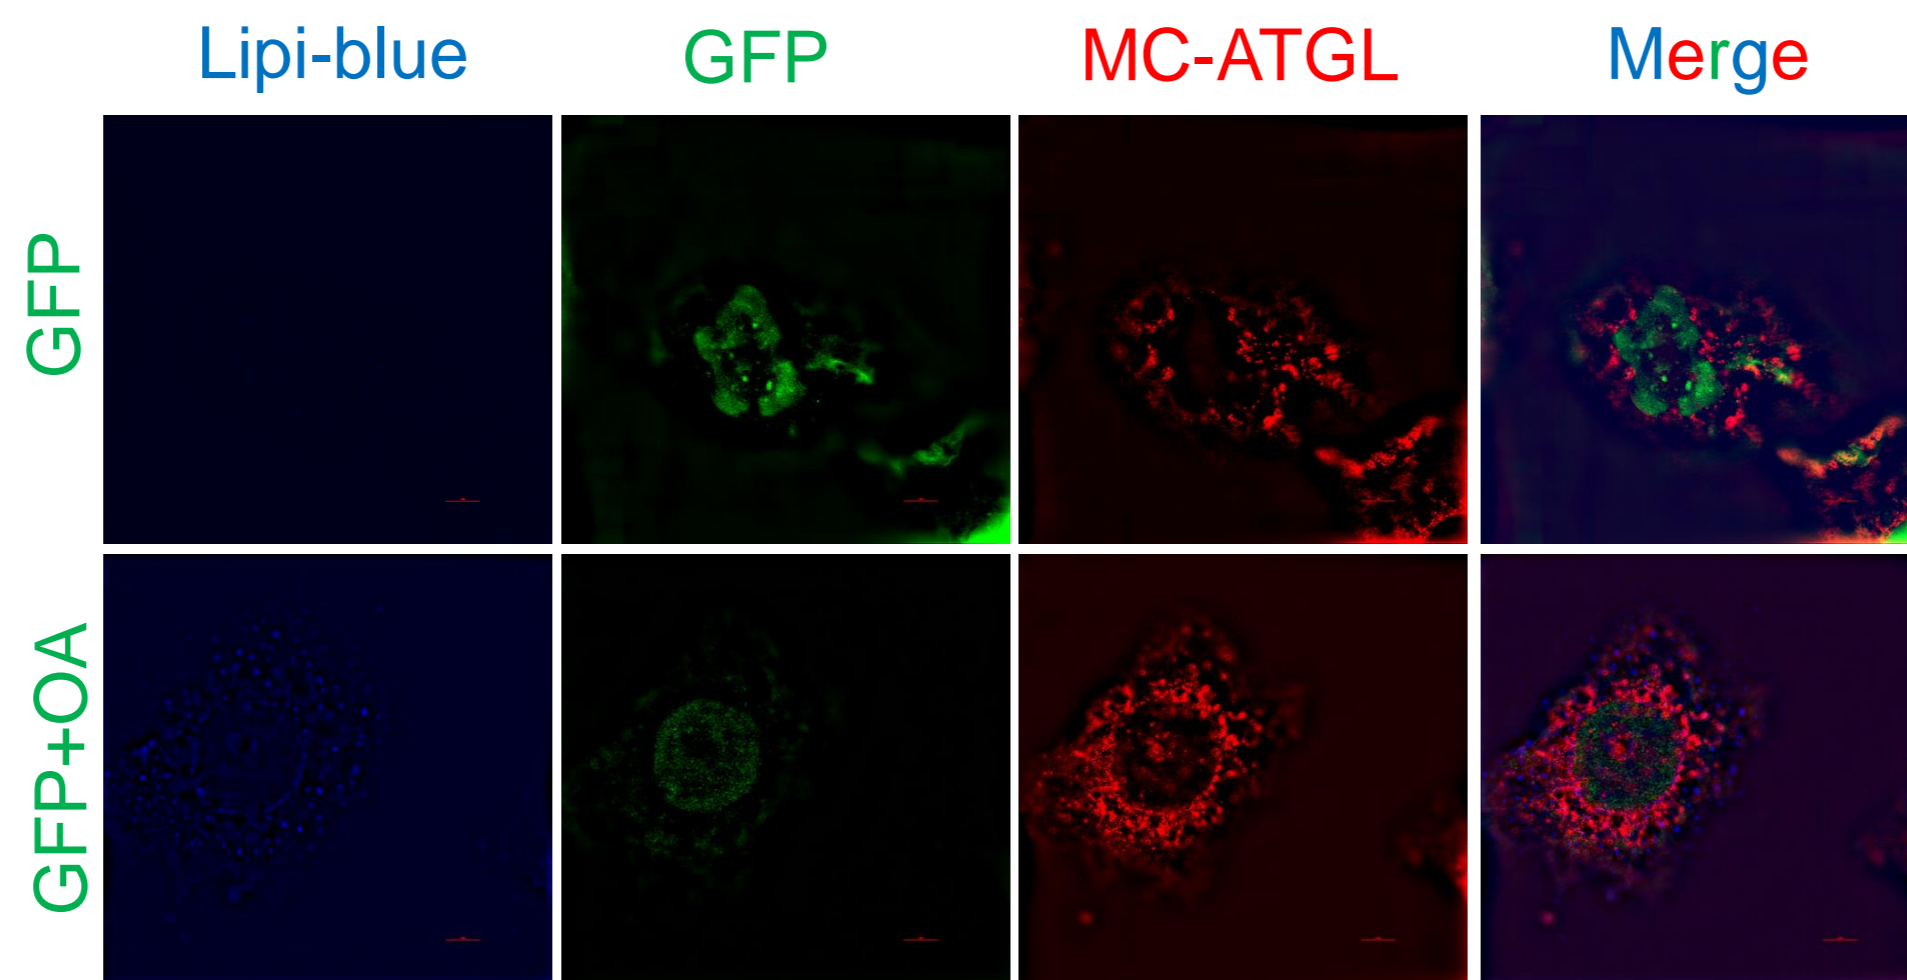

**Figure S5. 17 $\beta$ -HSD13 directly binds to ATGL *in vitro*.**

Huh7 cells were stably infected with GFP lentivirus together with MC-ATGL lentivirus. 150mM OA was loaded for 16h. The cells were fixed and LDs were stained with Lipi-blue, an LD tracker. Cytosolic ATGL was translocated on the LD surface after OA loading; scale bar=5  $\mu$ m.

**a**

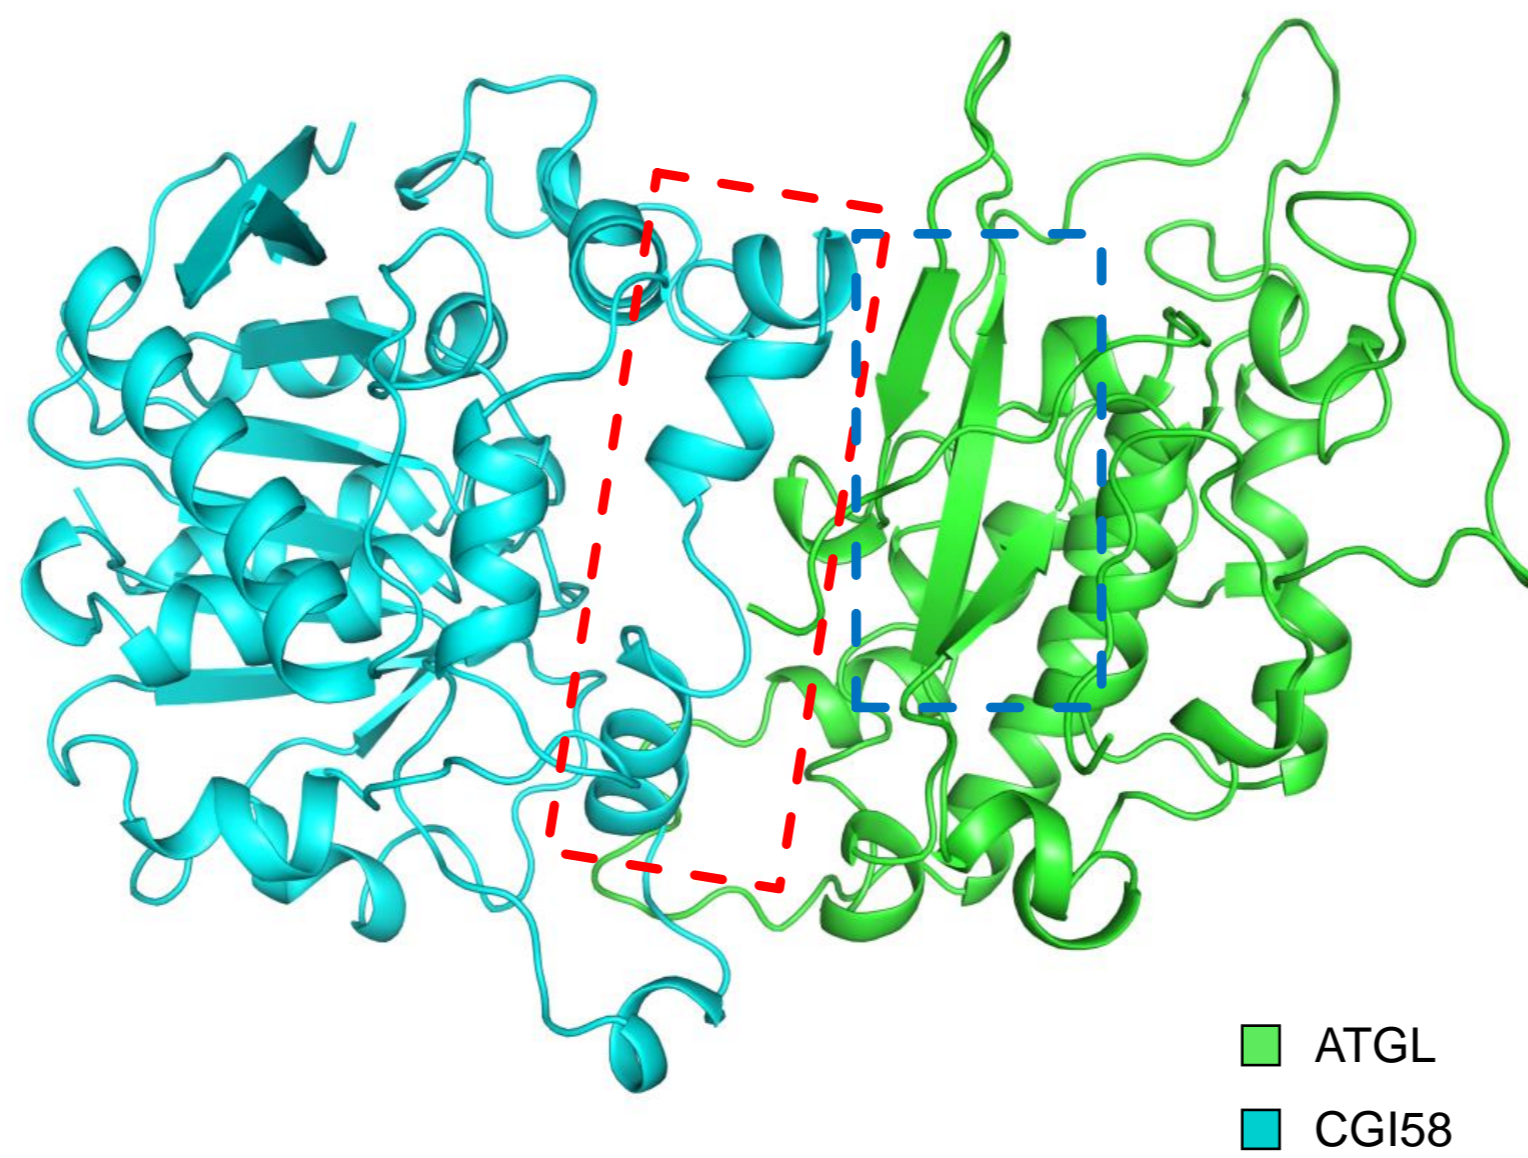

**b**

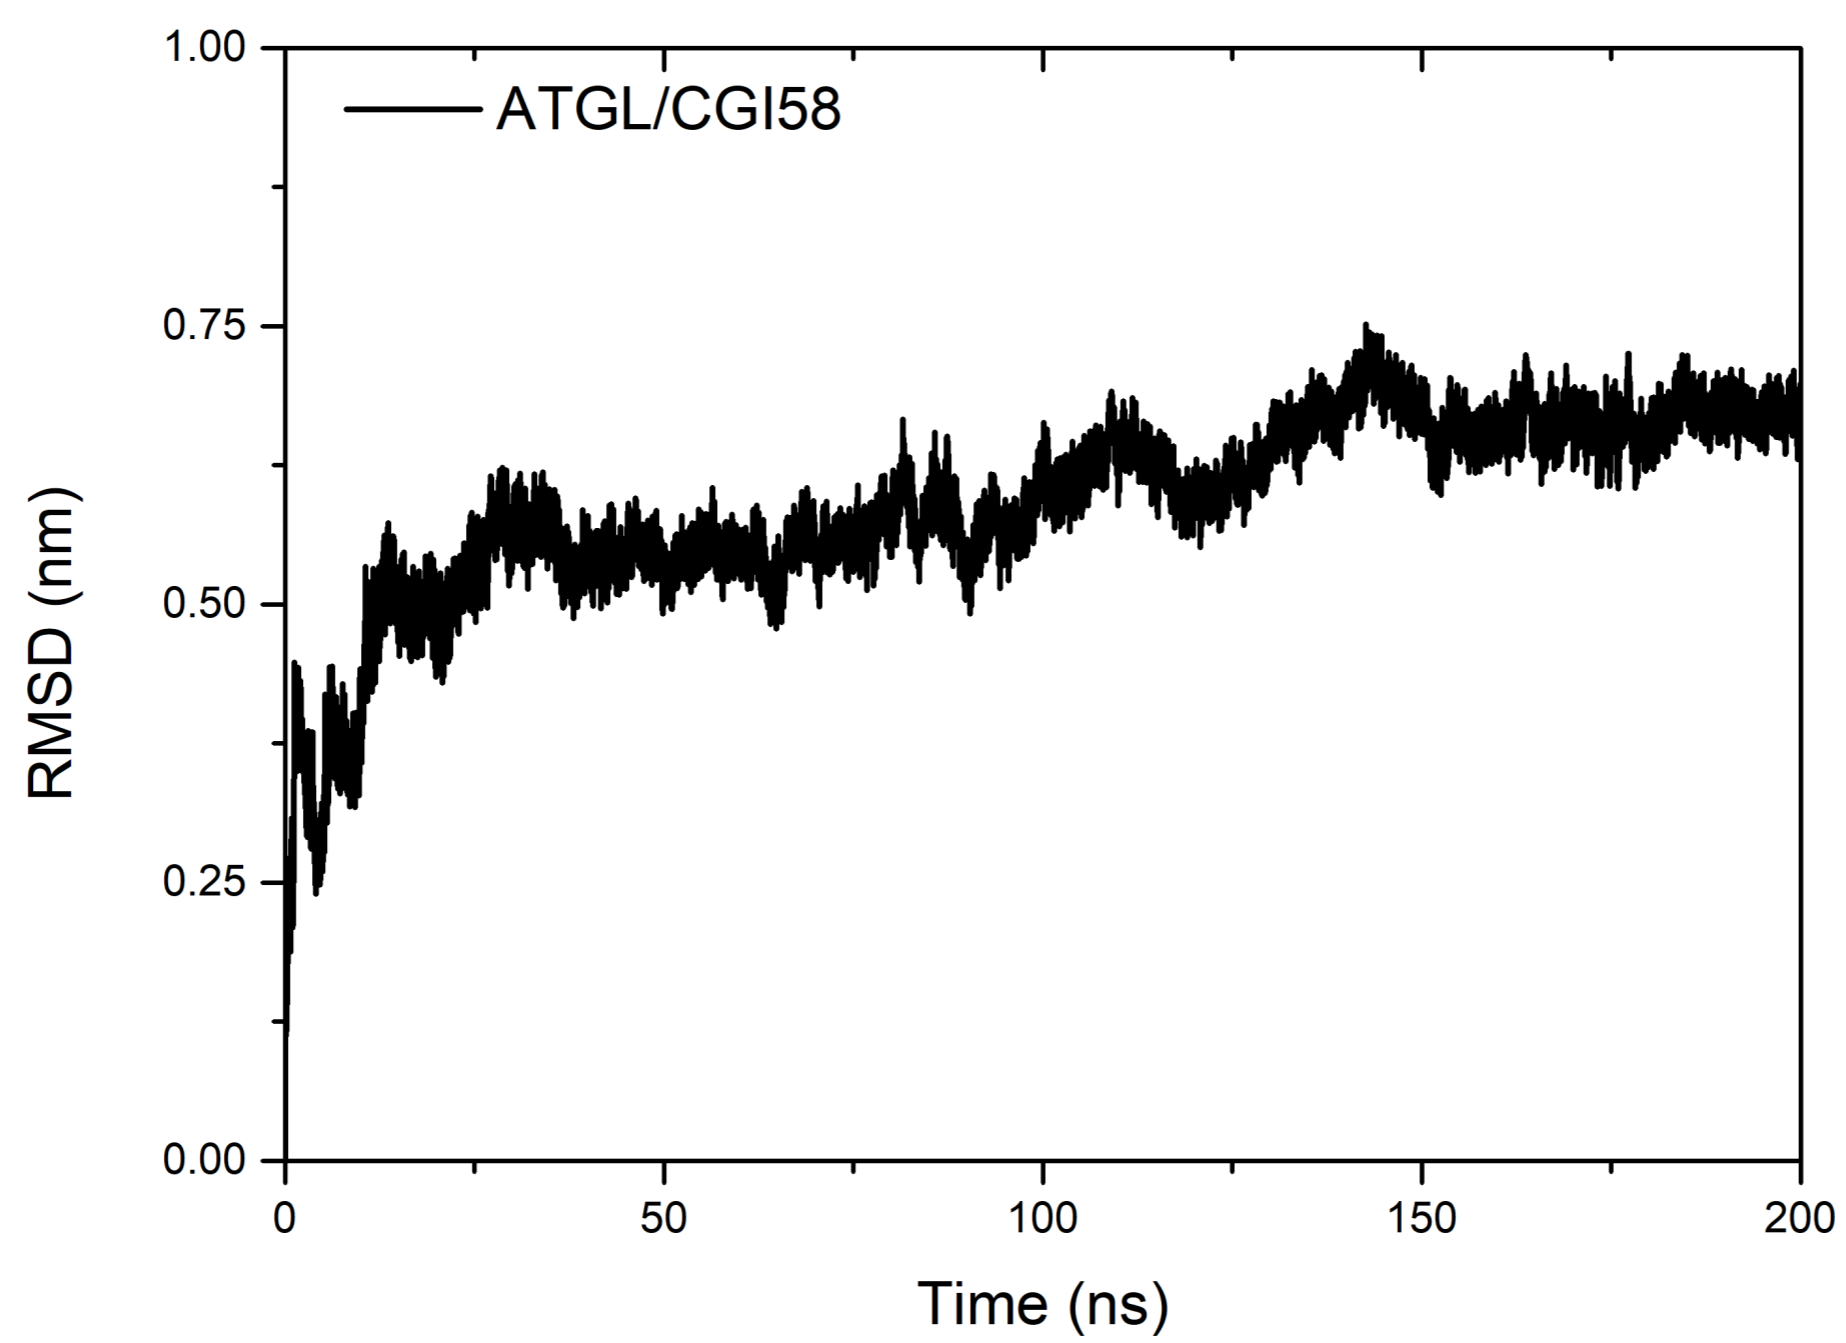

**Figure S6. The protein docking analysis of ATGL and CGI-58 interaction.**

**(a)** The structure of an ATGL-CGI58 dimer obtained from the protein-protein docking and the subsequent MD relaxation.

**(b)** The RMSD curve of the ATGL-CGI58 complex system along with the time trace from the MD simulation.



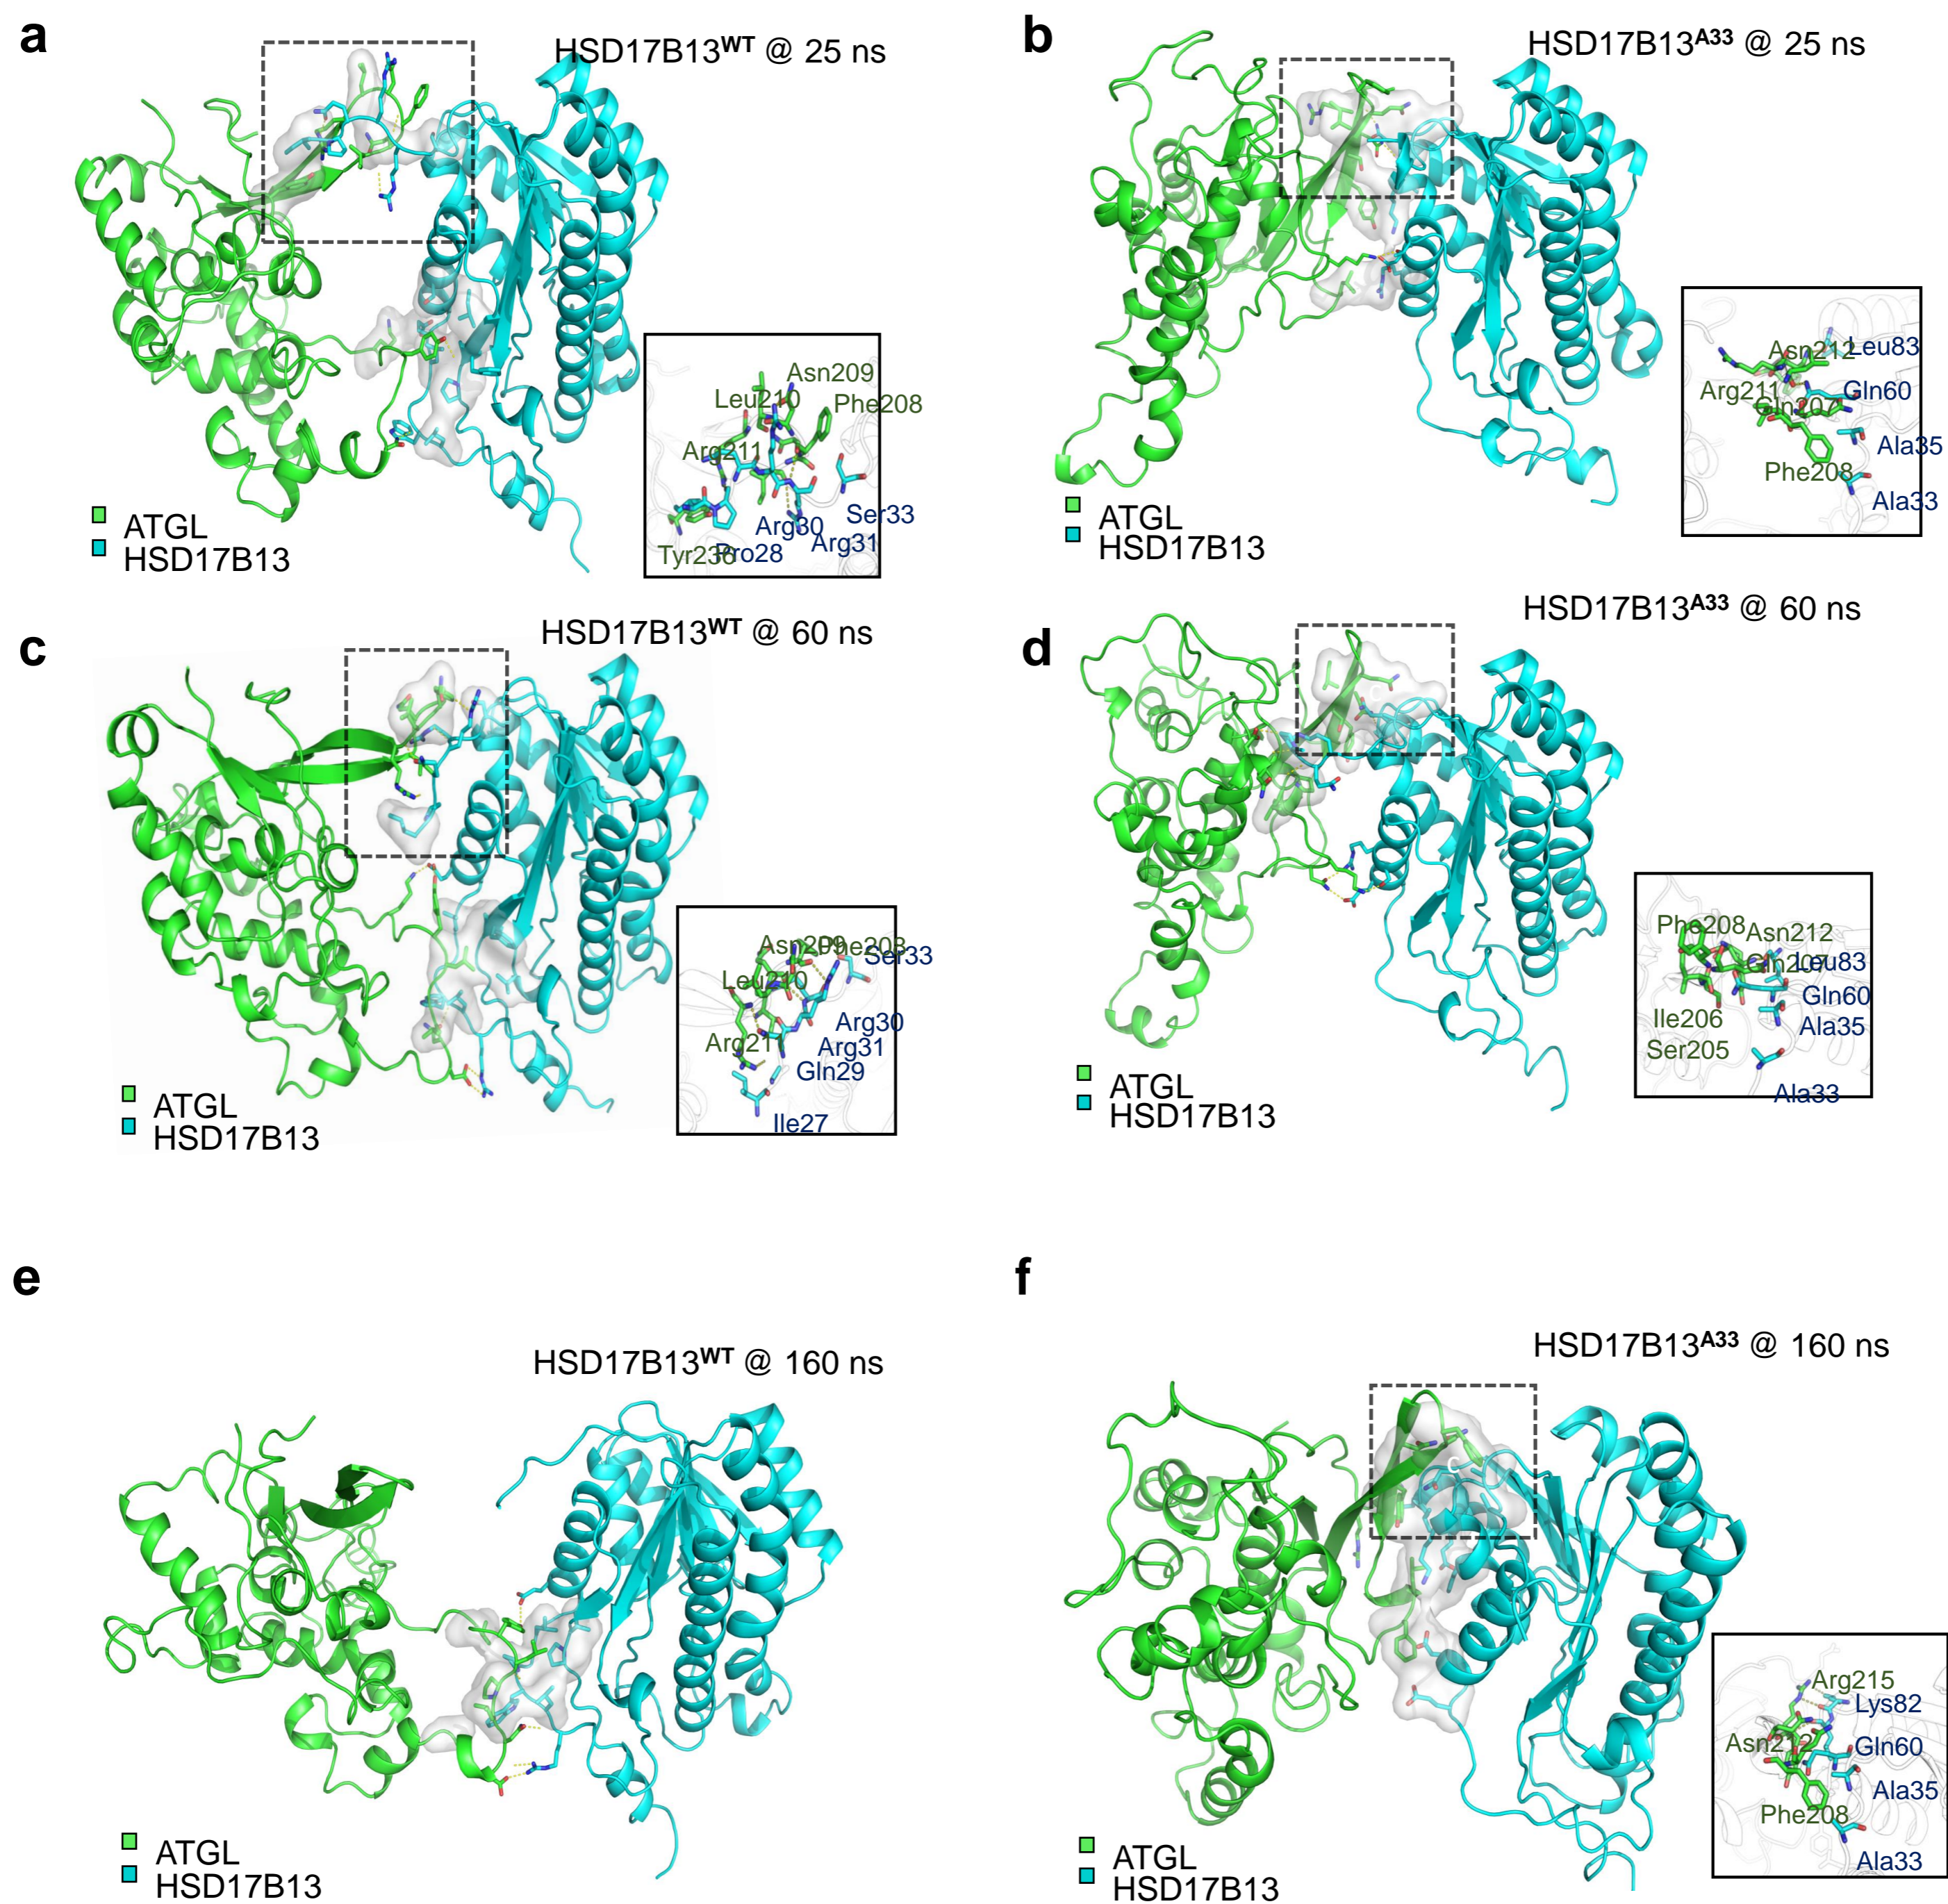

**Figure S7. Possible interaction sites of ATGL with 17 $\beta$ -HSD13-WT and 17 $\beta$ -HSD13-S33A.**

The snapshots of the MD simulation at 25ns of 17 $\beta$ -HSD13-WT-ATGL with the local structure around the S33 in 17 $\beta$ -HSD13-WT (**a**) or around the A33 in 17 $\beta$ -HSD13-S33A (**b**); The snapshots of the MD simulation at 60ns of 17 $\beta$ -HSD13-WT-ATGL with the local structure around the S33 in 17 $\beta$ -HSD13-WT (**c**) or around the A33 in 17 $\beta$ -HSD13-S33A (**d**); The snapshots of the MD simulation at 160ns of 17 $\beta$ -HSD13-WT-ATGL with the local structure around the S33 in 17 $\beta$ -HSD13-WT (**e**) or around the A33 in 17 $\beta$ -HSD13-S33A (**f**).



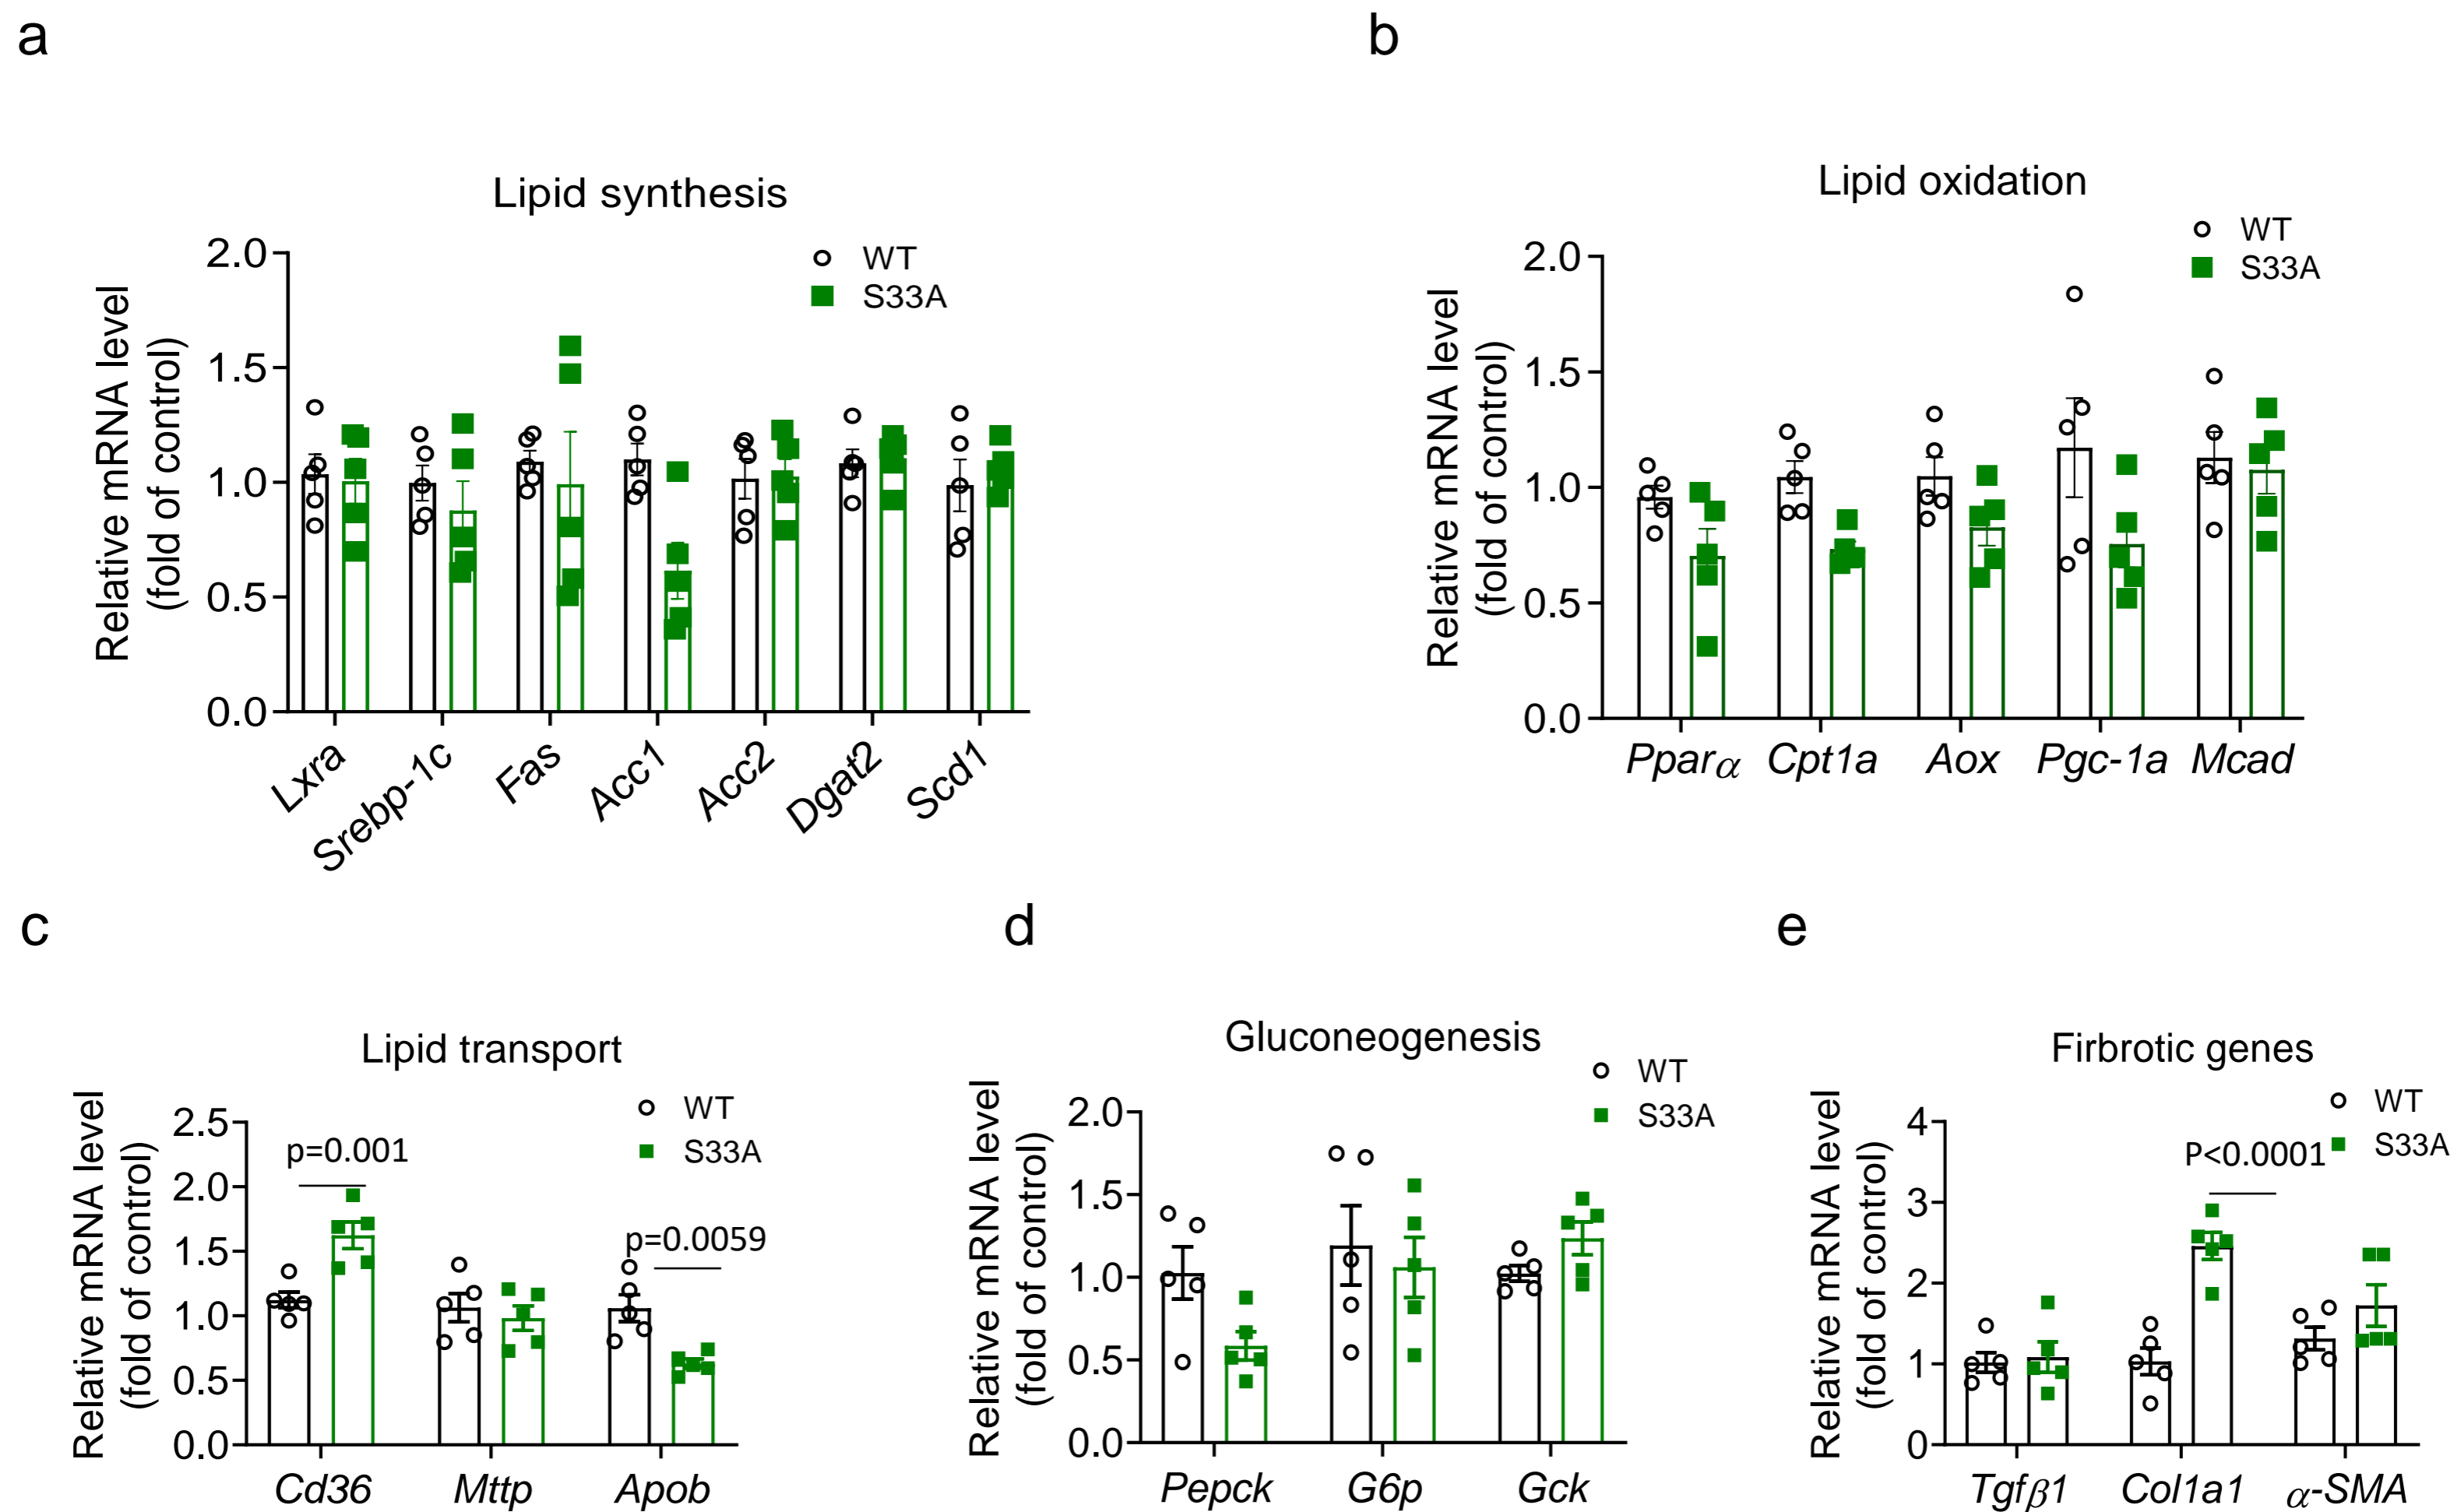

**Figure S8. Expression of genes involved in lipid metabolism and transport and gluconeogenesis in the livers of the *Hsd17B13*<sup>+/+</sup> and *Hsd17b13*<sup>S33A/+</sup> mice fed a high-fat diet.**

Expression of genes related to lipid synthesis (a), lipid oxidation (b), lipid transport (c), gluconeogenesis (d), and fibrosis (e) in the livers of the *Hsd17b13*<sup>+/+</sup> (WT) and *Hsd17b13*<sup>S33A/+</sup> (S33A) mice fed with a high-fat diet (HFD) for 3 months was quantified by qPCR. WT:  $n=5$ ; S33A:  $n=5$  biologically independent animals. Data represent mean  $\pm$  SEM; Significance was calculated by two-way ANOVA with Bonferroni post hoc analysis.

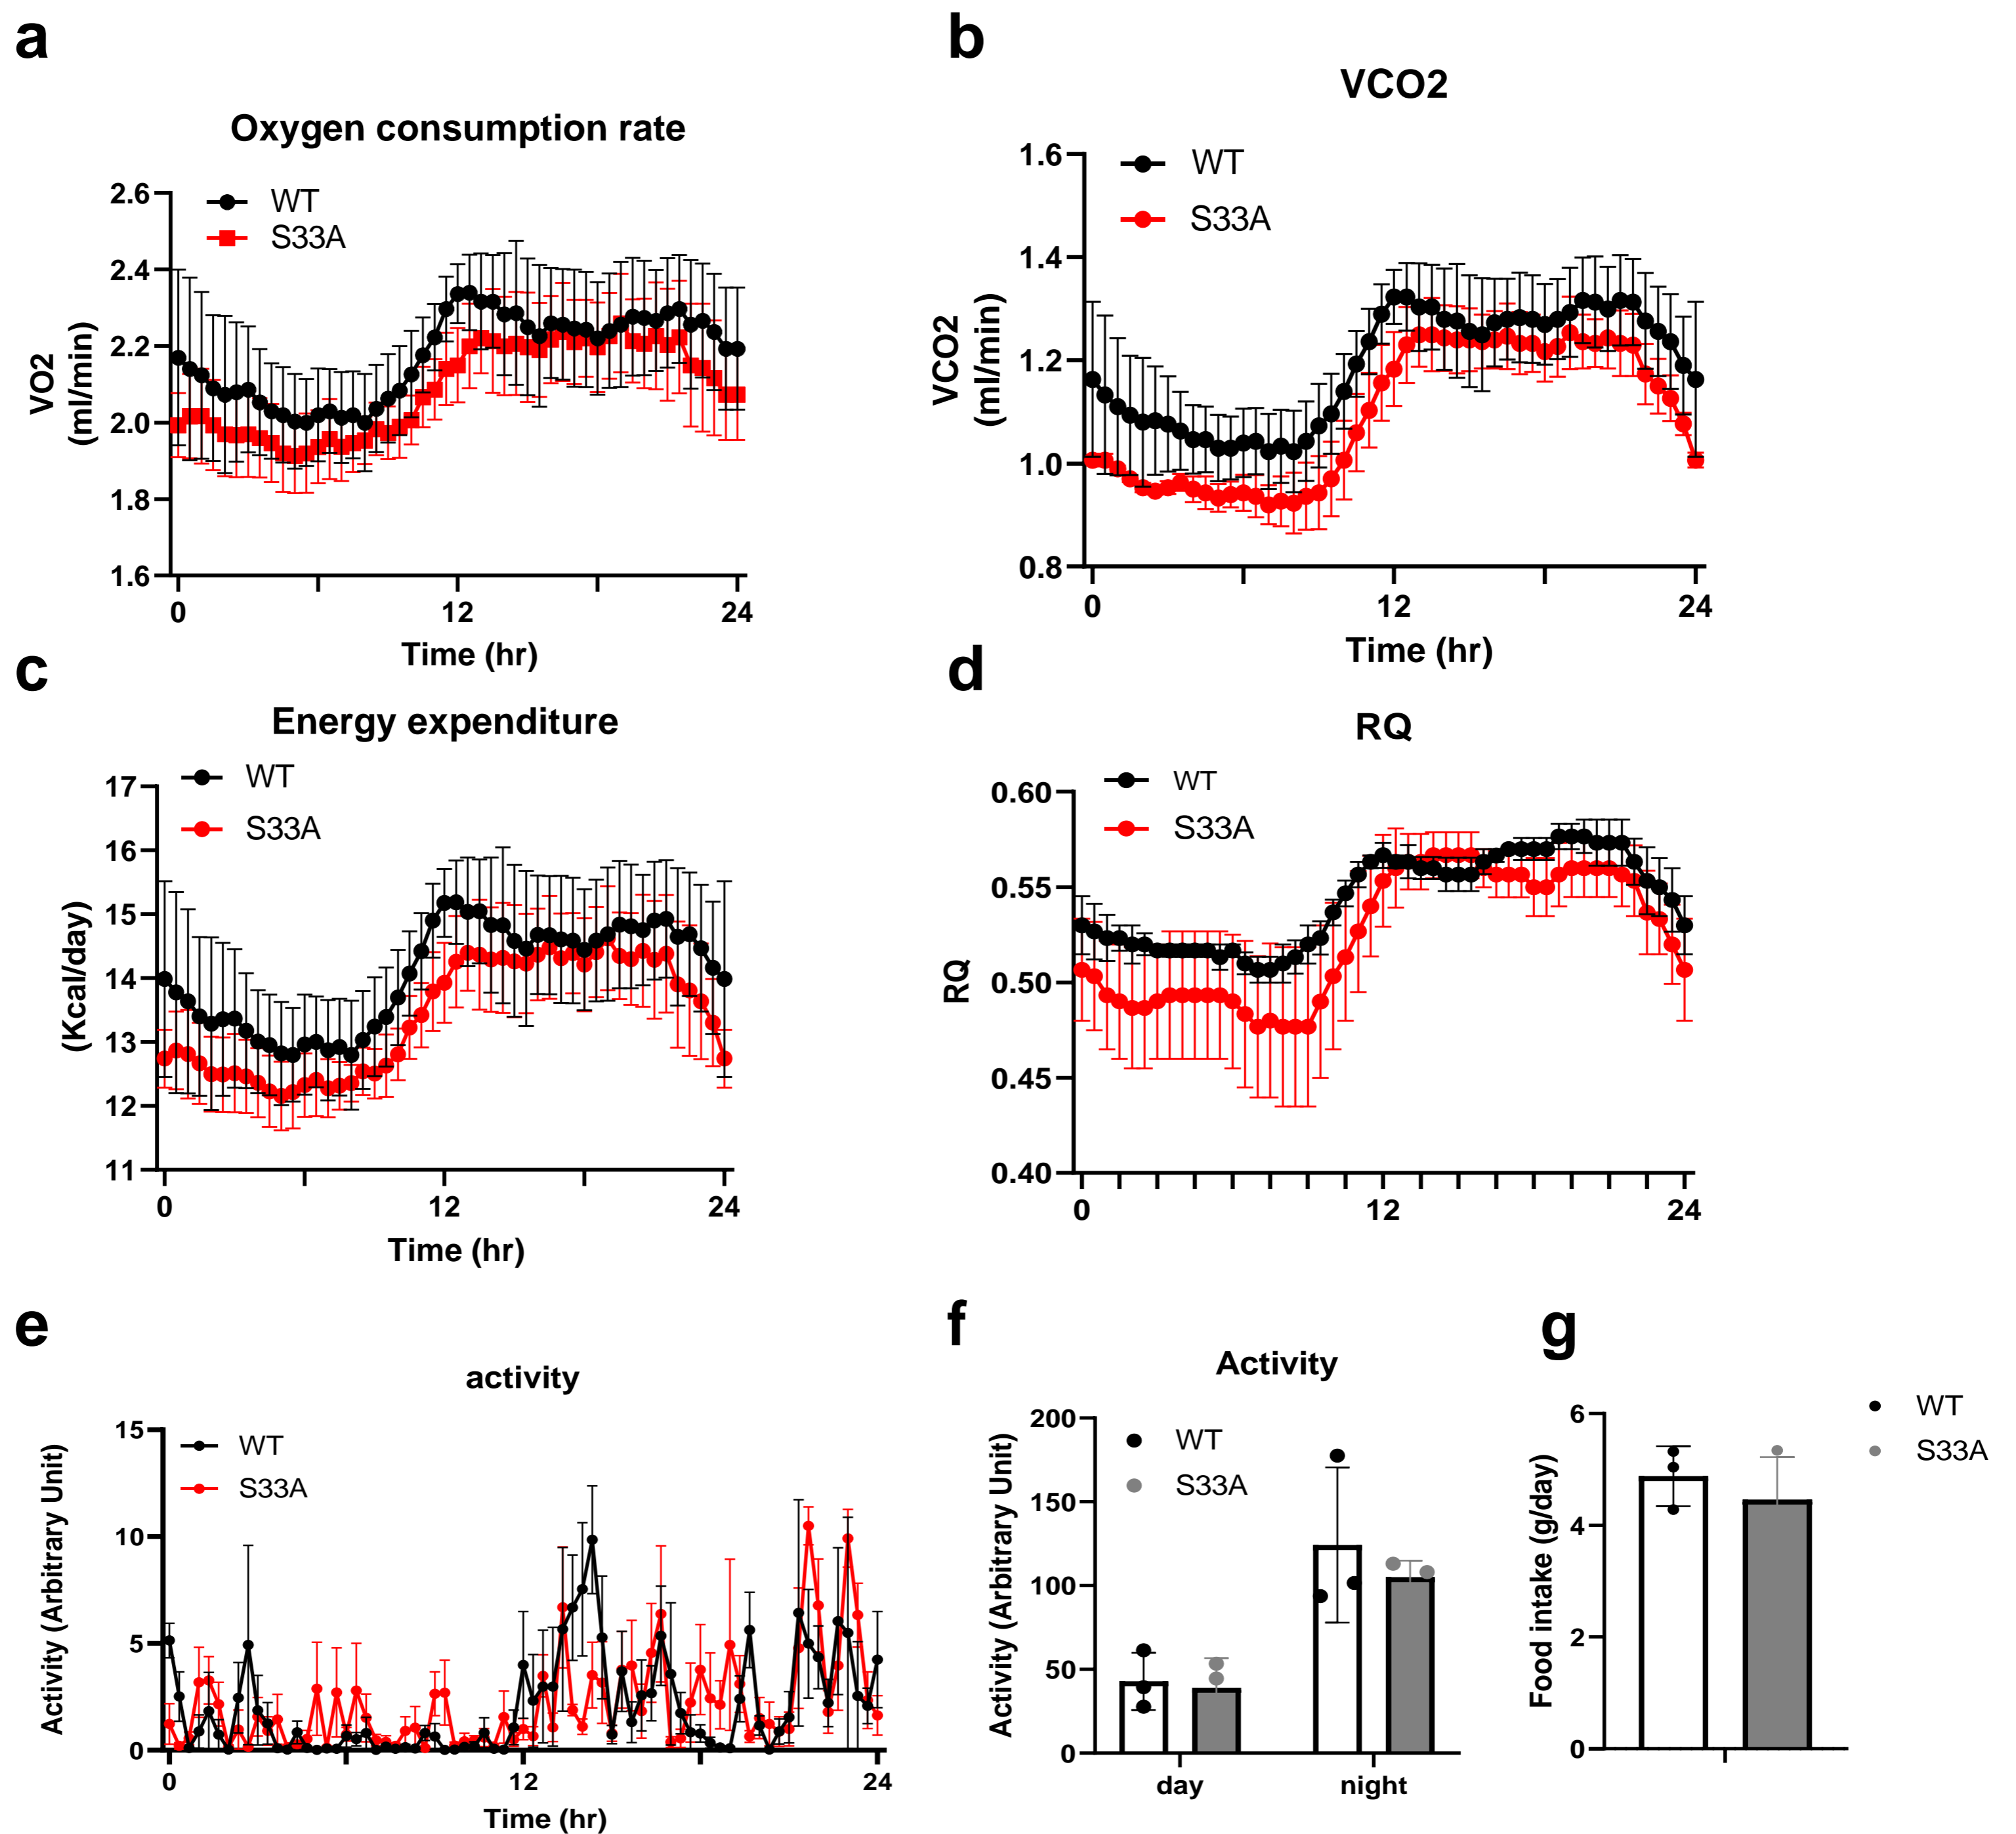

**Figure S9. Whole-body energy metabolism in the *Hsd17b13*<sup>+/+</sup> and *Hsd17b13*<sup>33A/A</sup> mice fed an HFD.** Metabolic cage studies were performed in the *Hsd17b13*<sup>+/+</sup> and *Hsd17b13*<sup>33A/A</sup> mice. O<sub>2</sub> consumption (VO<sub>2</sub>) (a), CO<sub>2</sub> production (VCO<sub>2</sub>) (b), energy expenditure (c), RQ (d), activity (e, f) and daily food intake (g) in the *Hsd17b13*<sup>+/+</sup> (WT) and *Hsd17b13*<sup>33A/A</sup> (S33A) mice after feeding a high-fat diet for 3 months. WT: *n*=5; S33A: *n*=5 biologically independent animals. Data represent mean ± SEM; ANCOVA analysis was performed. No difference in EE was observed between two genotypes.



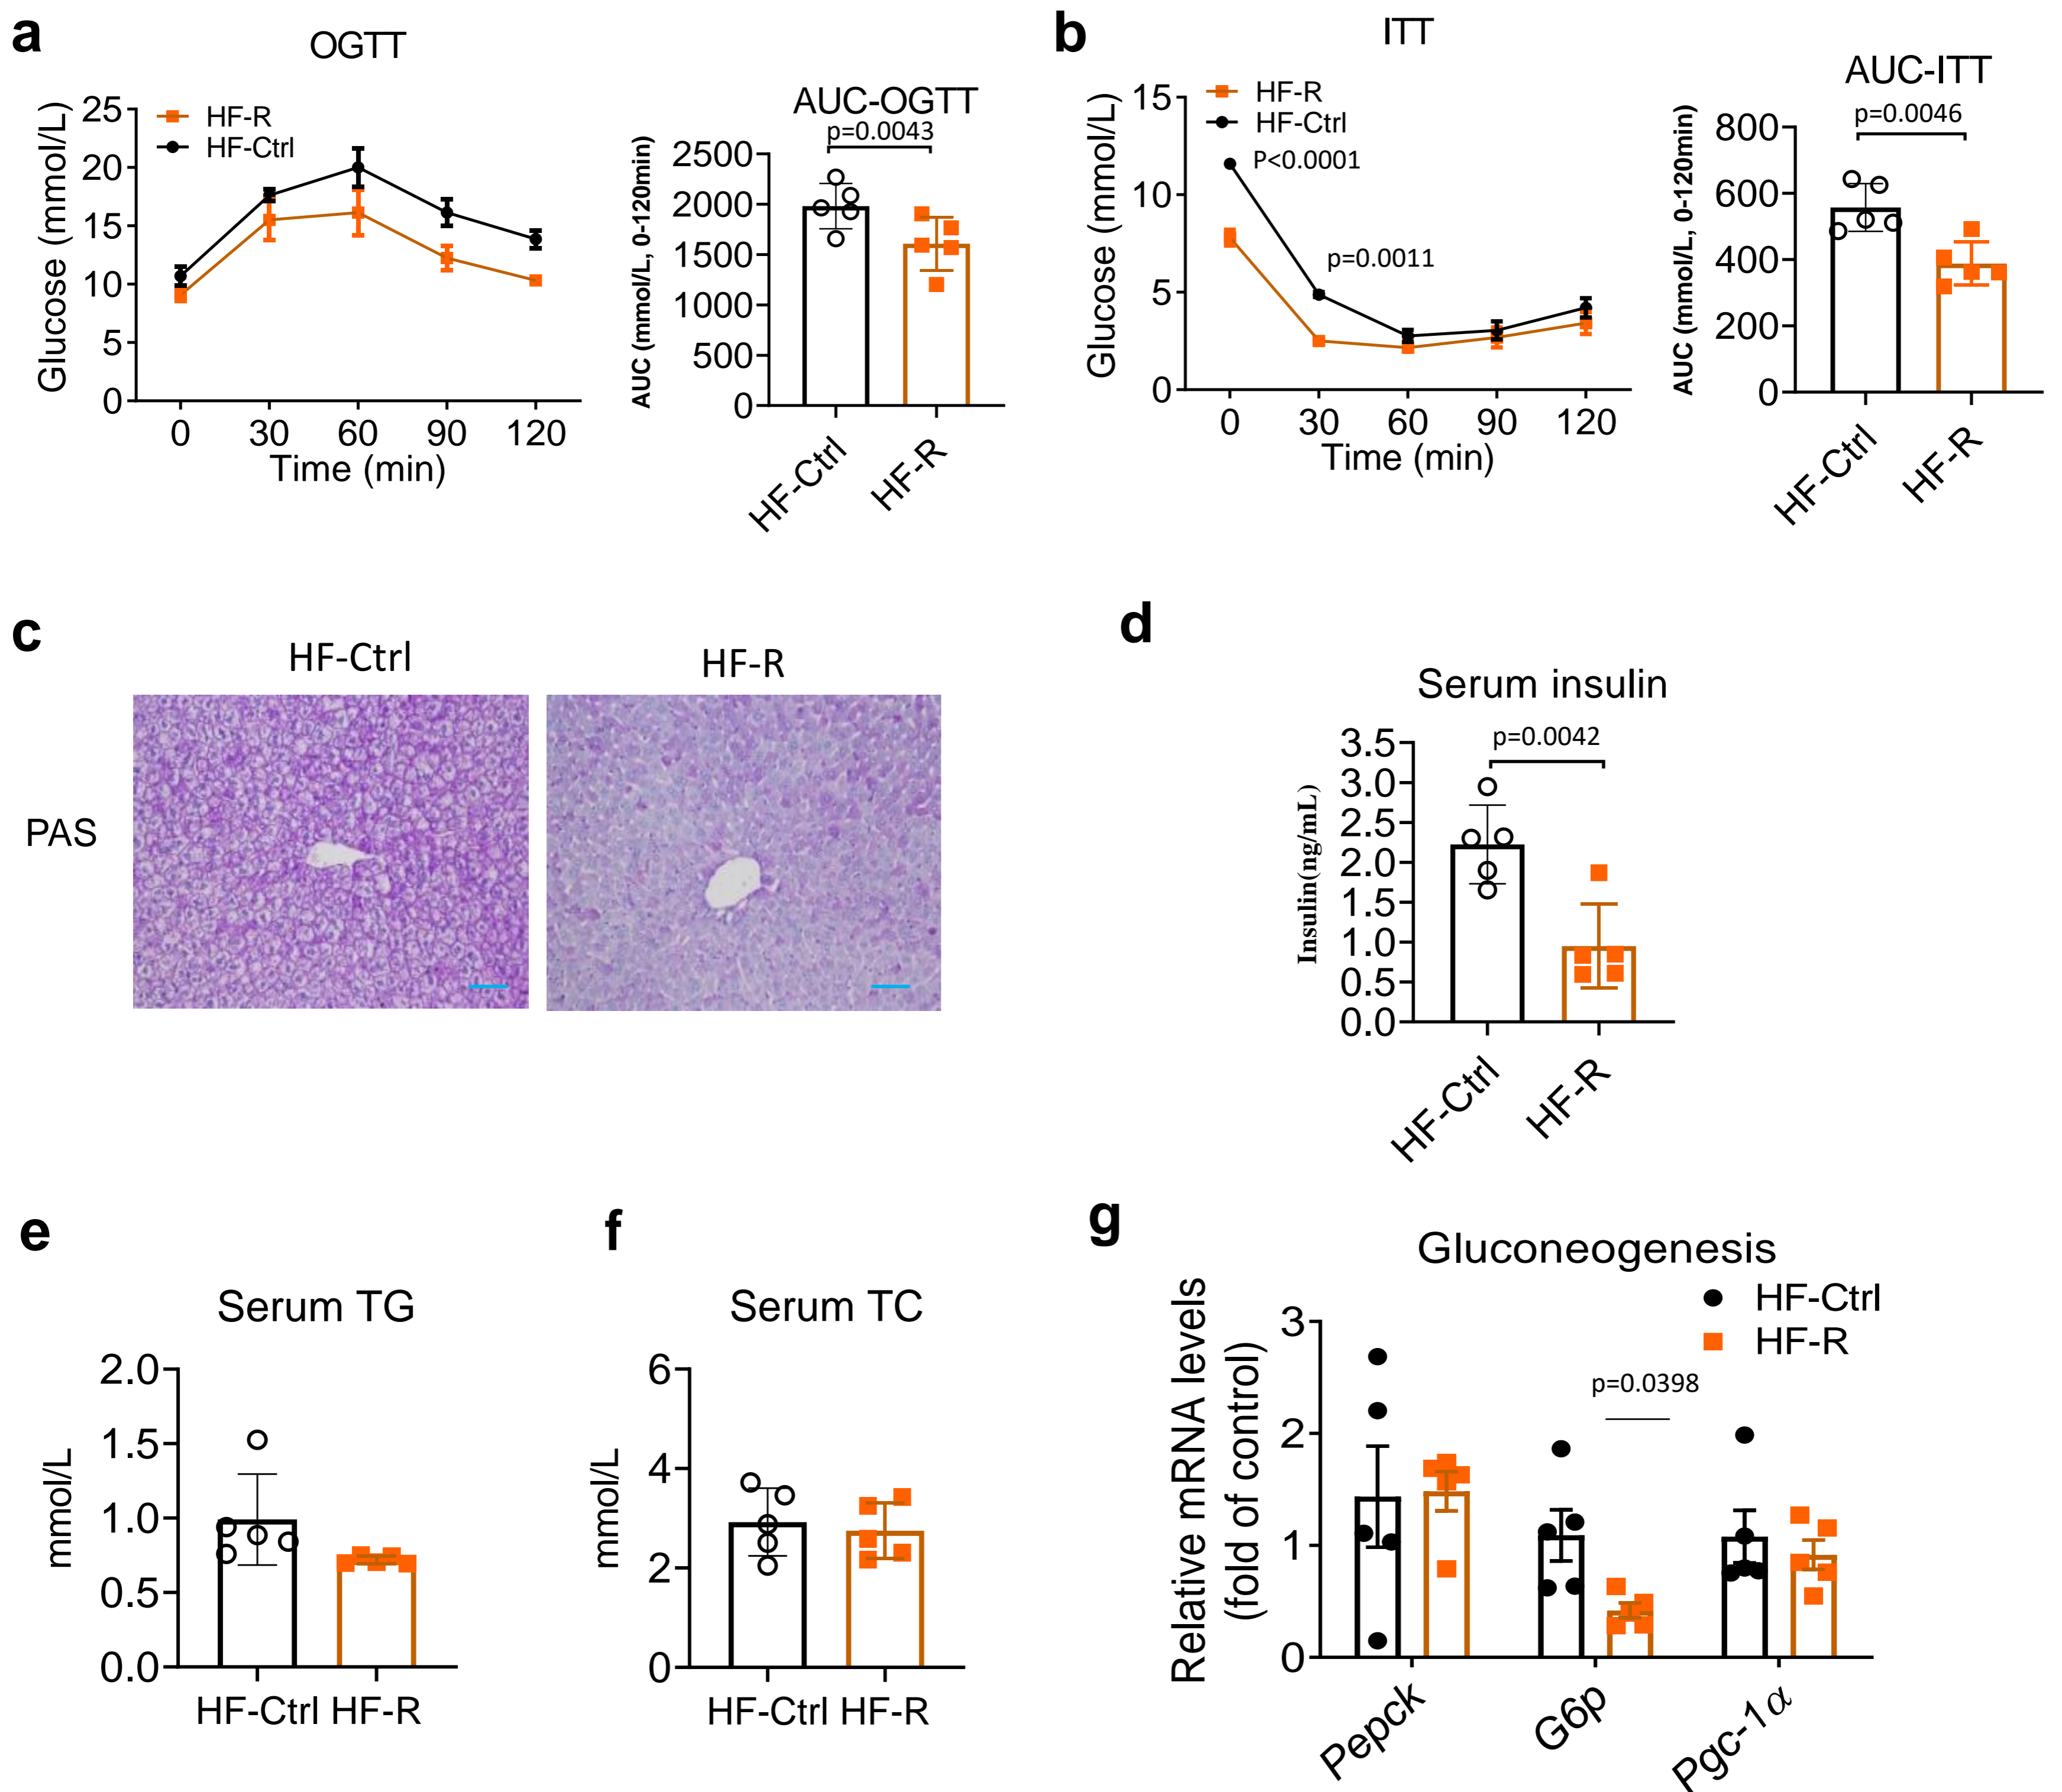

**Figure S10. Reproterol ameliorates HFD-induced insulin resistance.**

Male C57BL/6 mice at the age of 6 weeks were fed with a HFD for 16 weeks. Ten weeks after HFD treatment, mice began to receive reproterol treatment via intragastric administration at the dosage of 5mg/kg body weight daily for 6 weeks. HF-R, mice receiving both HFD and reproterol; HF-Ctrl, mice only receiving HFD. OGTT (a) and ITT (b) were performed after 1-month reproterol treatment. PAS staining (c) of HF-Ctrl and HF-R group (scale bar, 50  $\mu$ m). Serum insulin (d), serum triglycerides (TG) (e) and cholesterol (TC) (f) levels were measured. Quantitative PCR assay showing the changes in mRNA expression levels of genes involved in gluconeogenesis (g).

HF-Ctrl:  $n=5$ ; HF-R:  $n=5$  biologically independent animals. Data represent mean  $\pm$  SEM; Significance was calculated by two-tailed student's t test (d-f) or two-way ANOVA with Bonferroni post hoc analysis (a-b), (g).



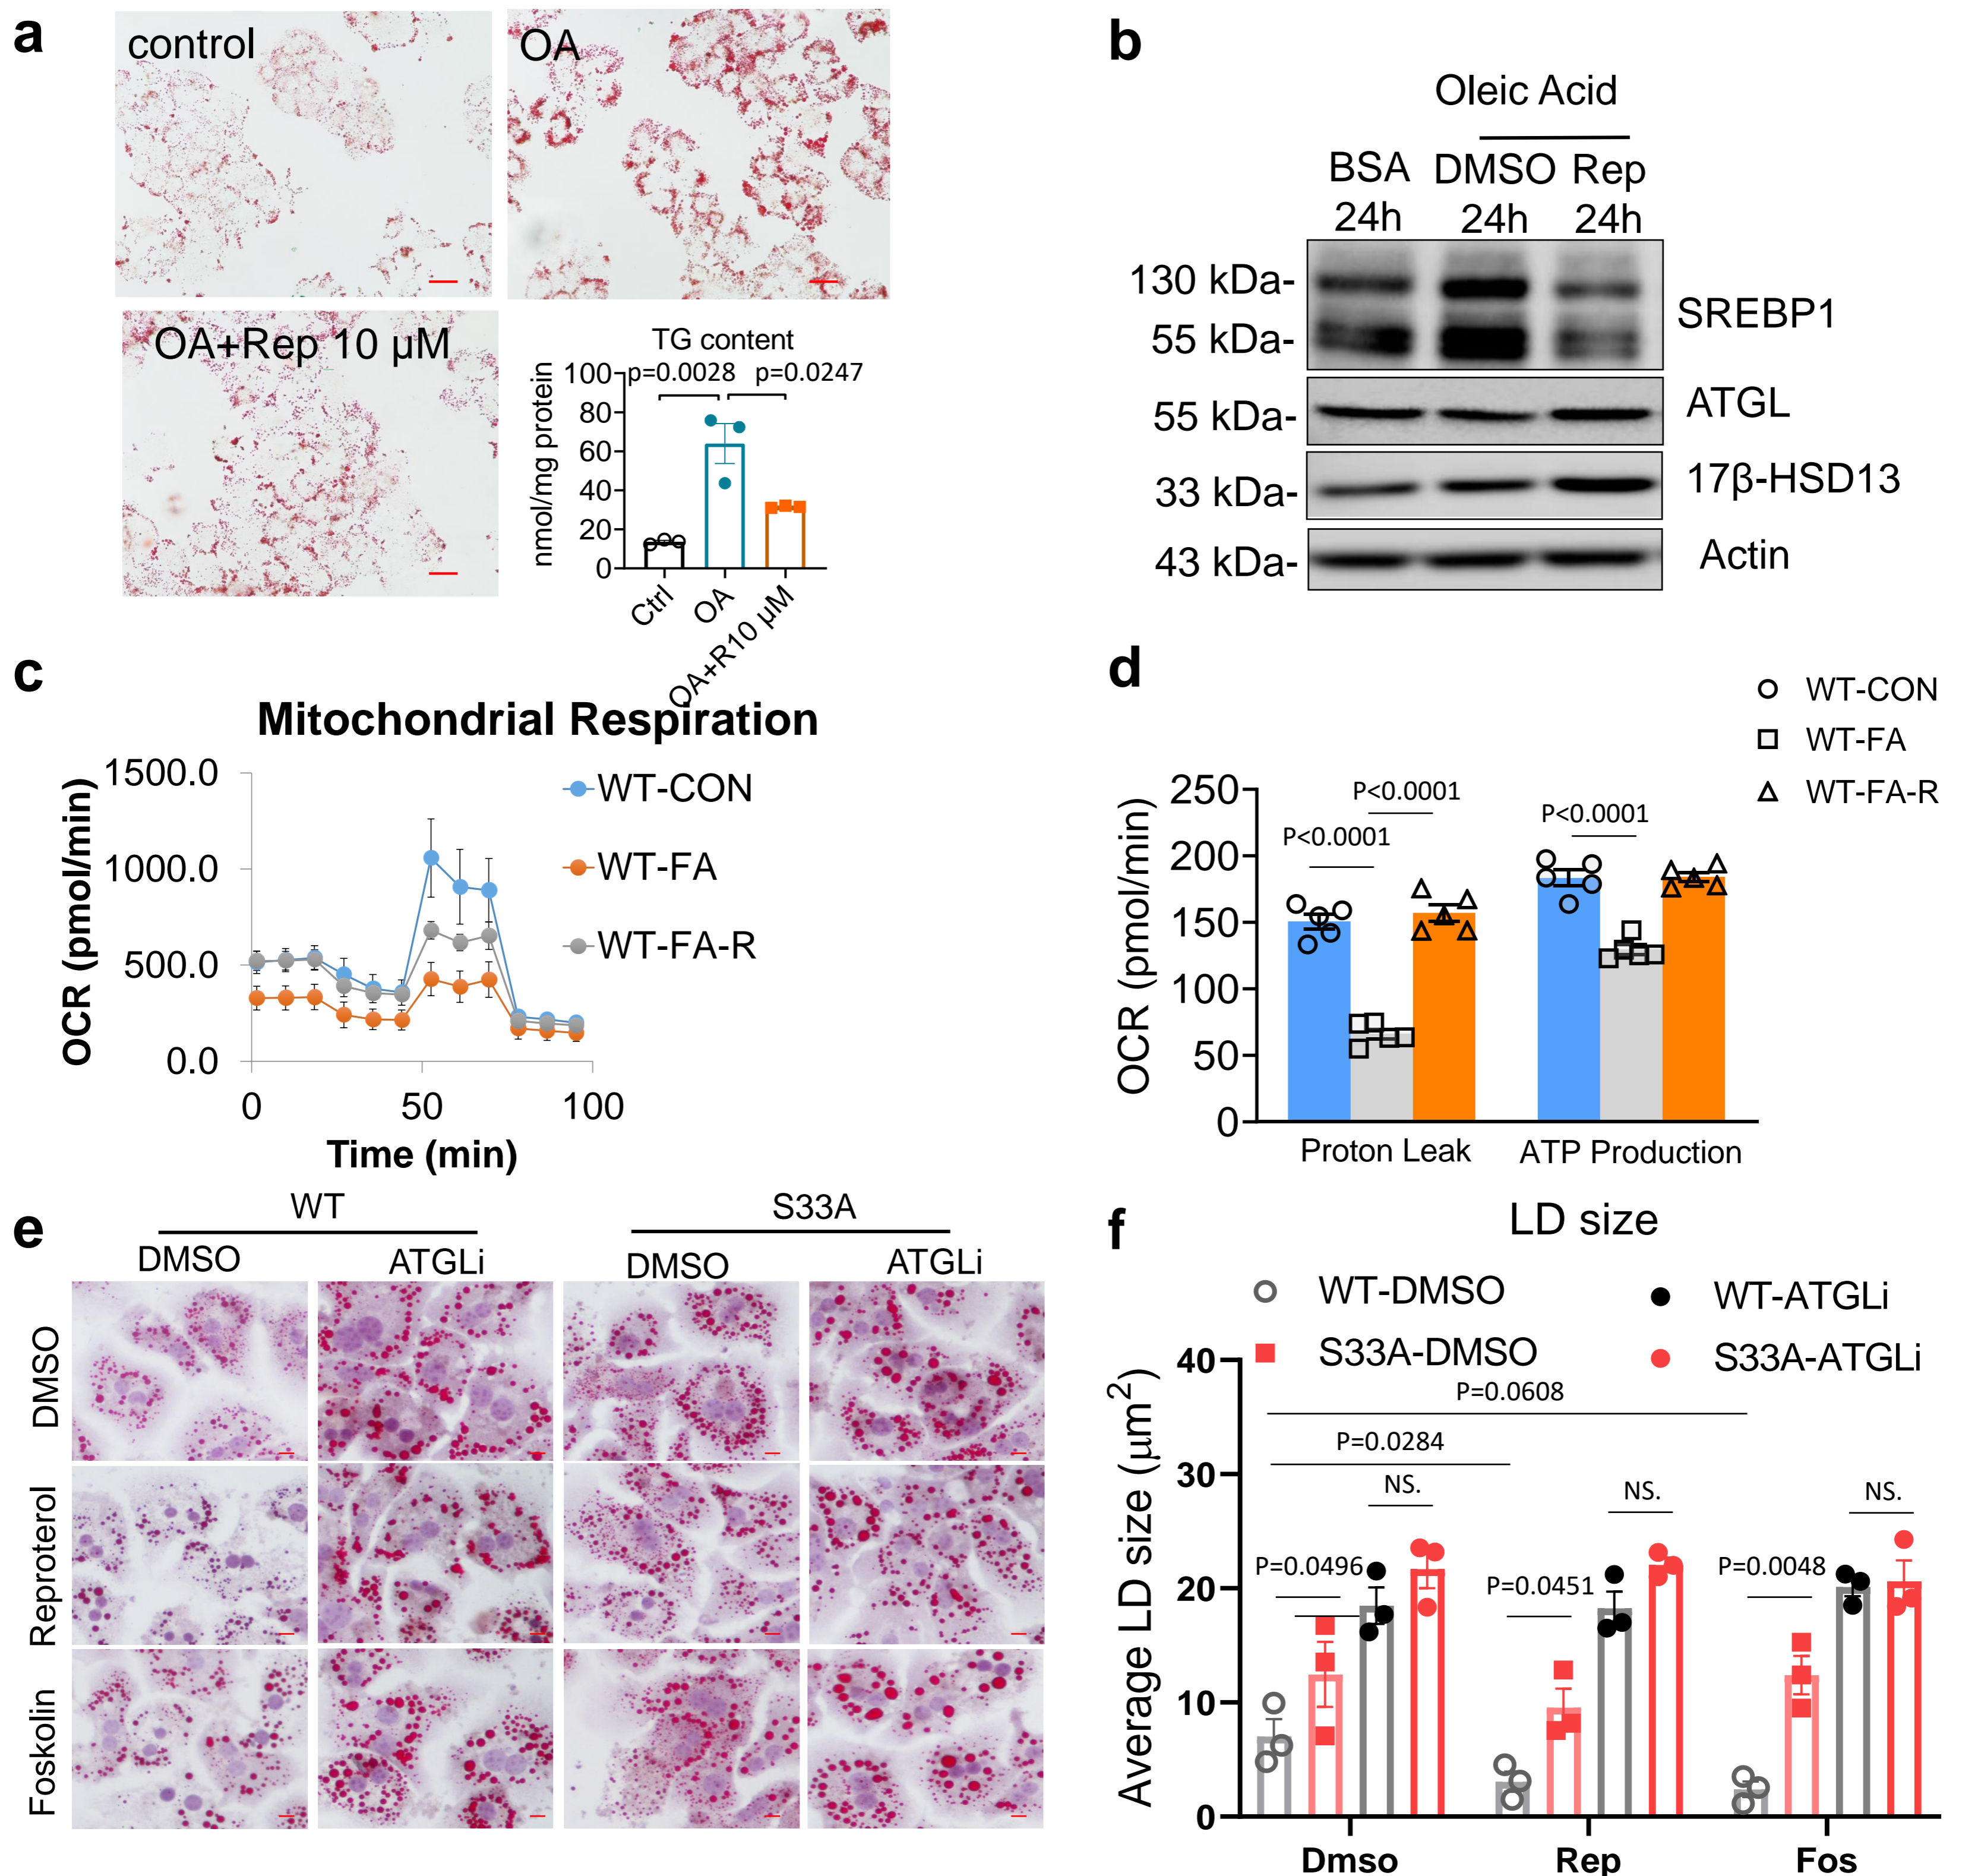

**Figure S11. Repraterol activates hepatic lipolysis by phosphorylating 17 $\beta$ -HSD13 at Ser33 in a PKA-dependent manner.**

(a) HepG2 cells were loaded with 200  $\mu$ M oleic acid (OA) for 24h with or without repraterol at the concentration of 10  $\mu$ M. Triglyceride (TG) contents were assessed in control (Ctrl), OA, and OA plus 10  $\mu$ M repraterol (Rep). Ctrl:  $n=3$ ; OA:  $n=3$ ; OA+R10  $\mu$ M:  $n=3$  biologically independent cells. (b) Primary hepatocytes were cultured and treated with 10  $\mu$ M repraterol for 24h. The protein expression of SREBP-1c, ATGL, 17 $\beta$ -HSD13, and  $\beta$ -actin were detected. BSA:  $n=3$ ; OA-DMSO:  $n=3$ ; OA-Rep:  $n=3$  biologically independent cells. (c-d) Primary hepatocytes were seeded in 24 Seahorse plate and treated with palmitate acid (FA) plus DMSO or repraterol. The mitochondrial respiration (c) and OCR (d) were measured. WT-CON:  $n=3$ ; WT-FA:  $n=3$ ; WT-FA-R:  $n=4$  biologically independent cells. (e-f) Primary hepatocytes from the WT and S33A mice were treated with 10  $\mu$ M of repraterol or 10  $\mu$ M forskolin for 24h and then processed to Oil Red O staining. Average LD size was analyzed (f).

Data presented are the mean  $\pm$  SEM of 3 replicates. One-way ANOVA with Bonferroni post hoc analysis was performed. Significance was calculated by two-tailed student's t test (a) or two-way ANOVA with Bonferroni post hoc analysis (d, f).



**Supplemental Table 1. Primer list for the mice experiments.**

| <b>Gene</b>     | <b>Forward primer sequence (5'-3')</b> | <b>Reverse primer sequence (5'-3')</b> |
|-----------------|----------------------------------------|----------------------------------------|
| <i>Hsd17b13</i> | CTCTGGCCACATTGTCACAG                   | TGCAACTTCTTCCGGCTCTA                   |
| <i>Ppara</i>    | CACGATGCTGTCCTCCTTGAT                  | GCCAGGCCGATCTCCA                       |
| <i>Cpt1a</i>    | ATCGTGGTGGTGGGTGTGATAT                 | ACGCCACTCACGATGTTCTTC                  |
| <i>Aox</i>      | TGTCATTCTACCAACTGTC                    | CCATCTTCTCAACTAACACTC                  |
| <i>Pgc-1a</i>   | CGCCGTGTGATTTACGTTGG                   | GCTGTCTCCATCATCCCGC                    |
| <i>Lcad</i>     | CCGCCCGATGTTCTCATTCT                   | CGCCATGTTTCTCTGCGATG                   |
| <i>Mcad</i>     | GCTAGTGGAGCACCAAGGAG                   | CCAGGCTGCTCTCTGGTAAC                   |
| <i>Lxra</i>     | ATCGCCTTGCTGAAGACCTCTG                 | GATGGGGTTGATGAACTCCACC                 |
| <i>Srebp-1c</i> | GGGCAAGTACACAGGAGGAC                   | AGATCTCTGCCAGTGTTGCC                   |
| <i>Fasn</i>     | GCCATGCCAGAGGGTGGTT                    | AGGGTCGACCTGGTCCTCA                    |
| <i>Acc1</i>     | TGGAGCTAAACCAGCACTCC                   | GCCAAACCATCCTGTAAGCC                   |
| <i>Acc2</i>     | CCAGTCTTCCGTGCCTTTGTAC                 | CTCATCCCTCGCTCTGAACG                   |
| <i>Dgat2</i>    | AGTGGCAATGCTATCATCATCGT                | AAGGAATAAGTGGGAACCAGA                  |
| <i>Scd1</i>     | CATGCGATCTATCCGTCGGT                   | CCTCCAGGCACTGGAACATAG                  |
| <i>Tgfβ1</i>    | TGACGTCACTGGAGTTGTACGG                 | GGTTCATGTCATGGATGGTGC                  |
| <i>Col1a1</i>   | CAATGCAATGAAGAACTGGACTGT               | TCCTACATCTTCTGAGTTTGGTGA               |
| <i>α-sma</i>    | CTGACAGAGGCACCACTGAA                   | CATCTCCAGAGTCCAGCACA                   |
| <i>Pepck</i>    | CTGAAGGTGTCCCCCTTGTC                   | GATCTTGCCCTTGTGTTCTGC                  |
| <i>G6p</i>      | CTGTTTGGACAACGCCCGTAT                  | AGGTGACAGGGAACTGCTTTA                  |
| <i>Gck</i>      | GAAGCACCGACTGTGACTGA                   | TGCCAGGATCTGCTCTACCT                   |
| <i>Cd36</i>     | GTGCAAACCCAGATGACGT                    | TCCAACAGACAGTGAAGGCT                   |
| <i>Mttp</i>     | GAGCGGTCTGGATTTACAACG                  | GTAGGTAGTGACAGATGTGGCTTTTG             |
| <i>Apob</i>     | TCACCCCCGGGATCAAG                      | TCCAAGGACACAGAGGGCTTT                  |
| <i>Fatp1</i>    | CGCTTTCTGCGTATCGTCTG                   | GATGCACGGGATCGTGTCT                    |
| <i>Fatp4</i>    | ACTGTTCTCCAAGCTAGTGCT                  | GATGAAGACCCGGATGAAACG                  |
| <i>Fatp5</i>    | CTACGCTGGCTGCATATAGATG                 | CCACAAAGGTCTCTGGAGGAT                  |
| <i>β-actin</i>  | GAGAGGGAAATCGTGCGTGAC                  | CATCTGCTGGAAGGTGGACA                   |

Fig S2a

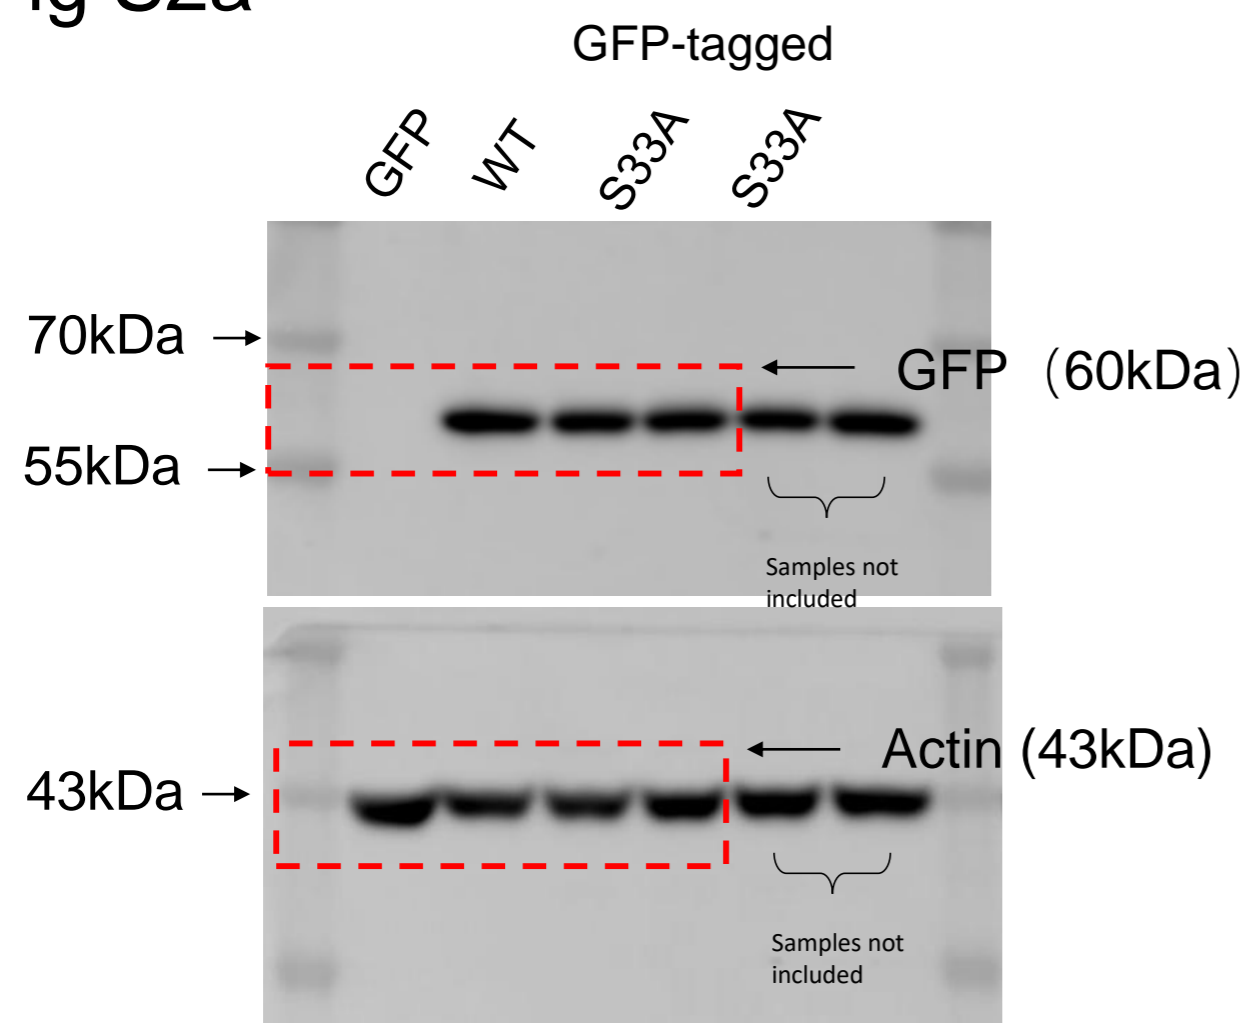

Fig S3e

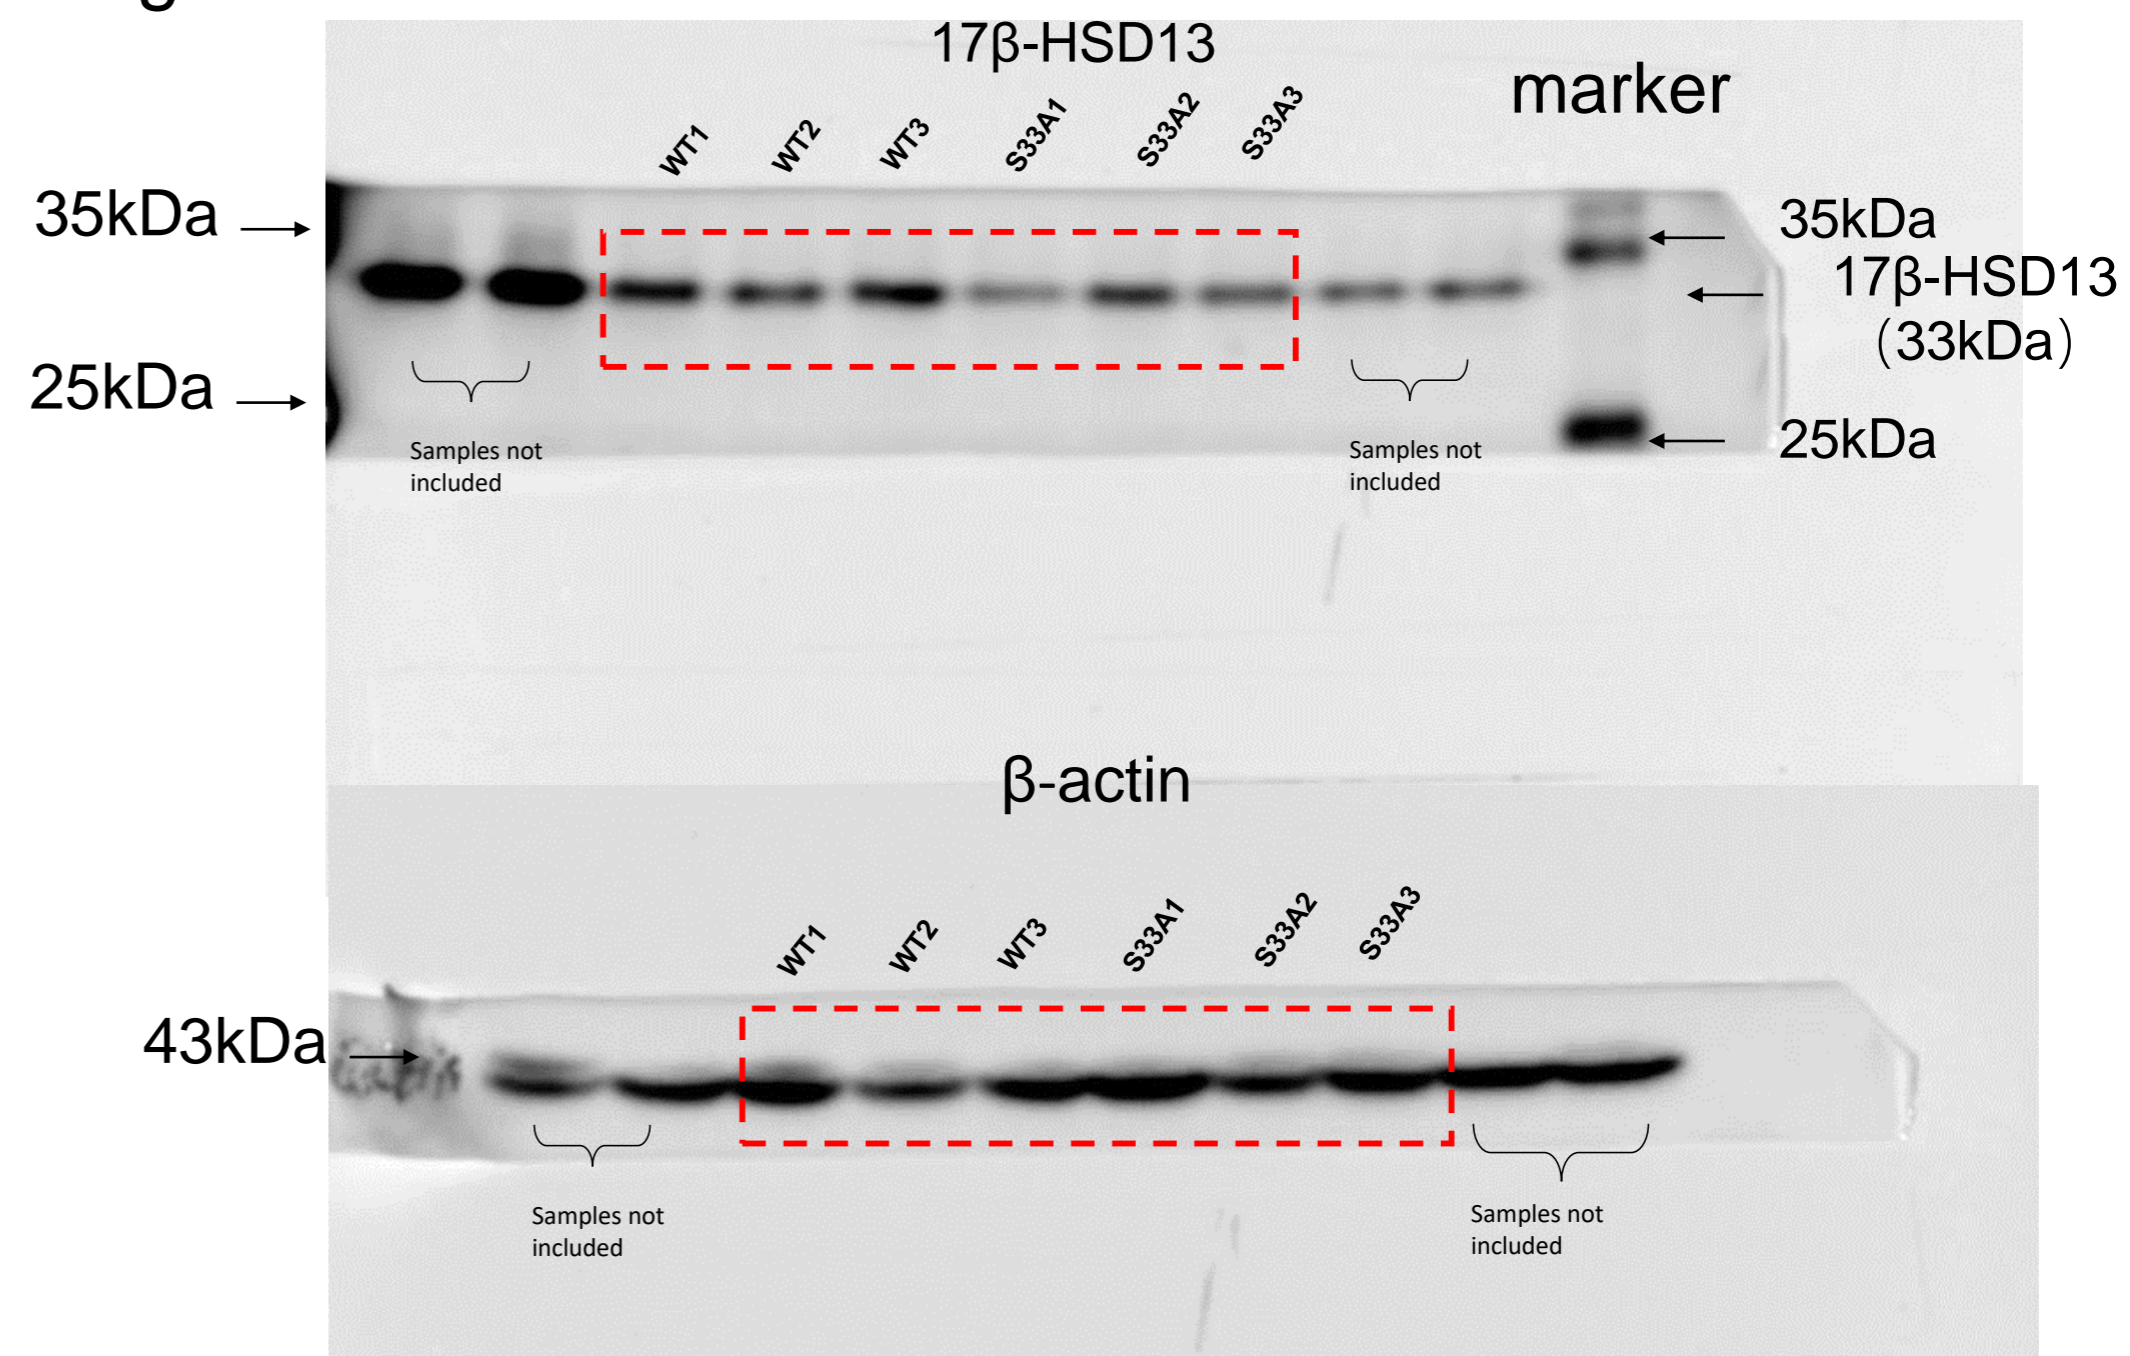

Fig S11b

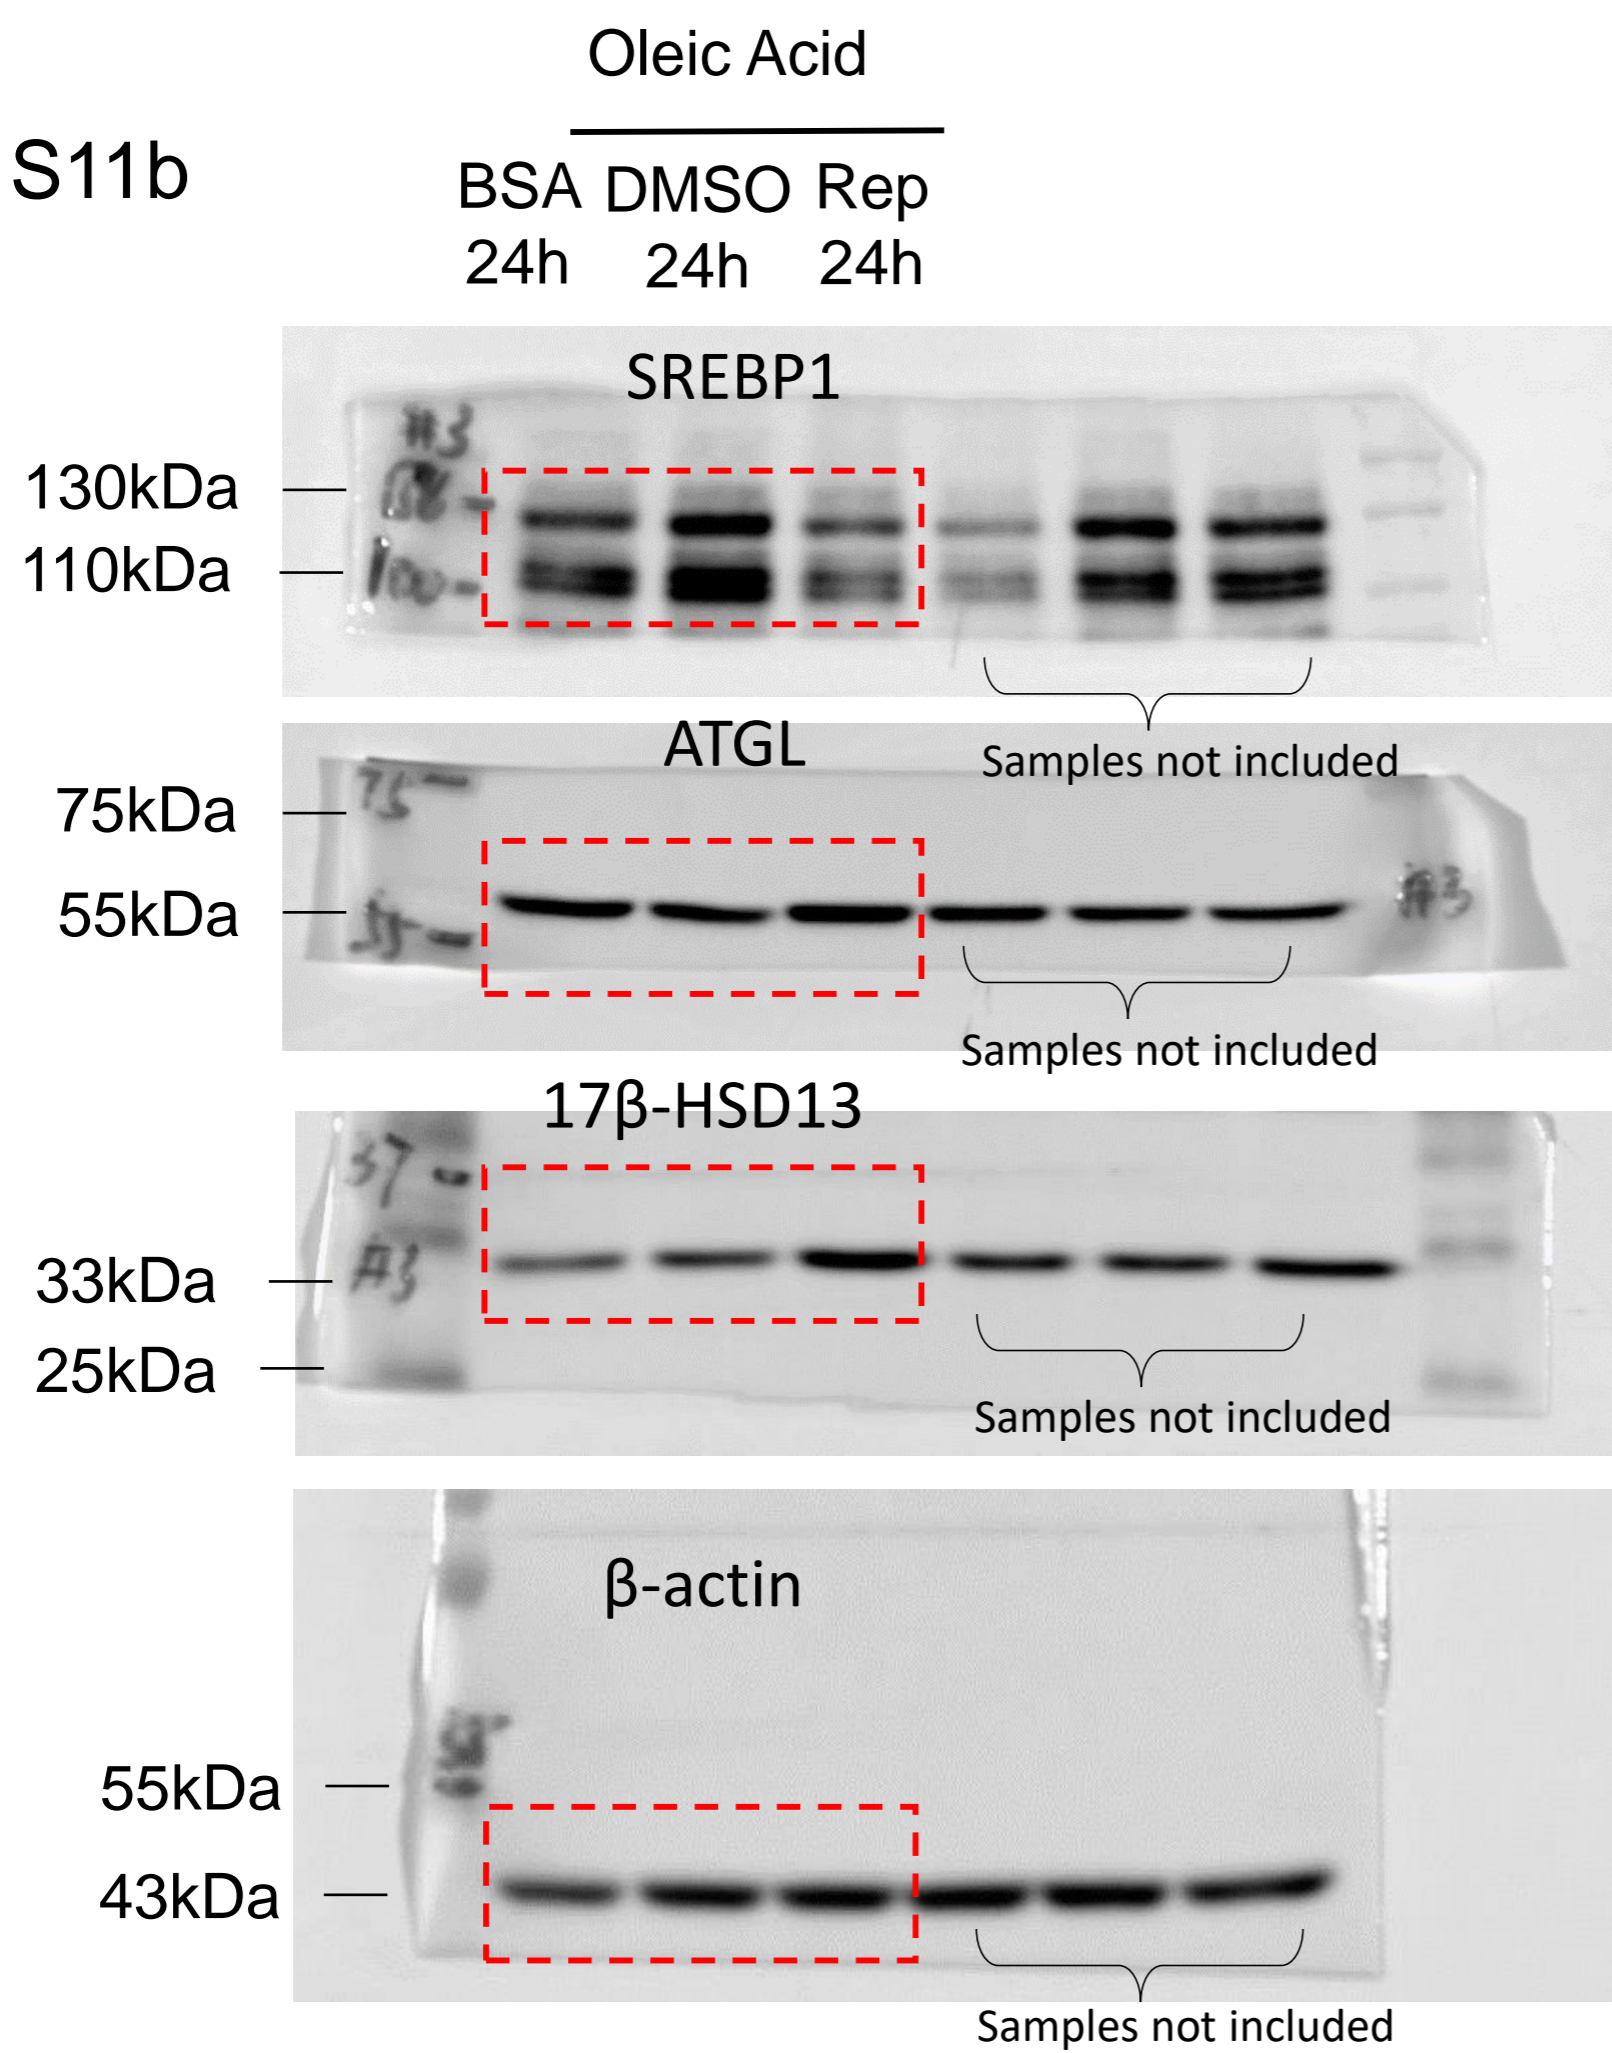

Supplement: 41467_2022_34299_MOESM1_ESM.pdf [file 41467_2022_34299_MOESM1_ESM.pdf]
